# Supplementary material for: Aerobically stable and substitutionally labile α-diimine rhenium dicarbonyl complexes
Source: Royal Society of Chemistry journal article supplement (doi:10.1039/d1ra00514f), 2021-01-01
Supplement: d1ra00514f1.pdf [file d1ra00514f1.pdf]

## SUPPORTING INFORMATION FOR

### **Aerobically stable and substitutionally labile $\alpha$ -diimine rhenium dicarbonyl complexes**

Kevin Schindler <sup>a</sup>, Aurelien Crochet <sup>a</sup> and Fabio Zobi <sup>a\*</sup>

<sup>a</sup> Department of Chemistry, University of Fribourg, Chemin du Musée 10, 1700 Fribourg, Switzerland.

\*To whom all the correspondence should be addressed.

Phone (+41) 26 300 87 85, Fax (+41) 26 300 97 37, E-mail : [fabio.zobi@unifr.ch](mailto:fabio.zobi@unifr.ch)

## Table of contents

$^1\text{H}$ -NMR and  $^{13}\text{C}$ -NMR spectra of **3-8** – Figures S1-S12 – page 3-8

IR spectra (solid state) of **1-8** – Figures S13-S20 – page 9-12

UV-Vis spectra (in DMF) of **1-8**– Figures S21-S27 – page 13-16

Crystallographic details– Tables S1-S4 – page 17-20

Calculated molecular orbitals– Figures S28-S31 – page 21-24

DFT energy diagrams– Figures S32-S33 – page 25

## NMR spectra

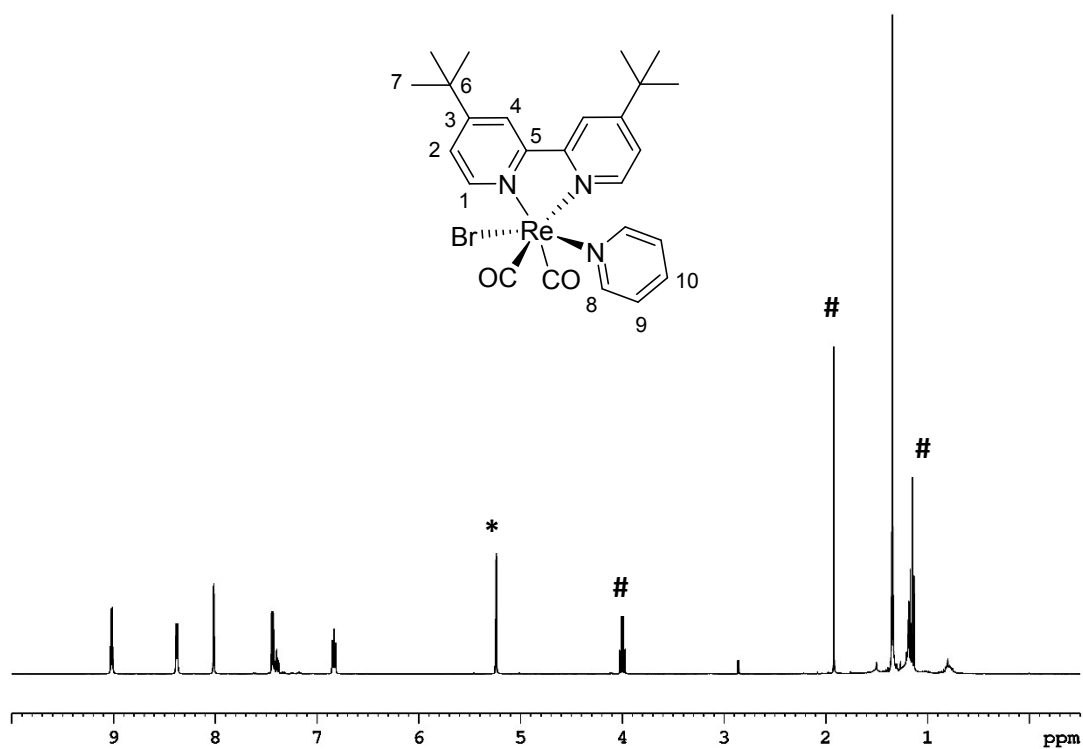

**Figure S1.** 400 MHz  $^1\text{H}$ -NMR of **3** (in  $\text{CD}_2\text{Cl}_2$ , \* = solvent residual peak of DCM, # = solvent residual peaks of ethyl acetate). Numbers correspond to the main text.

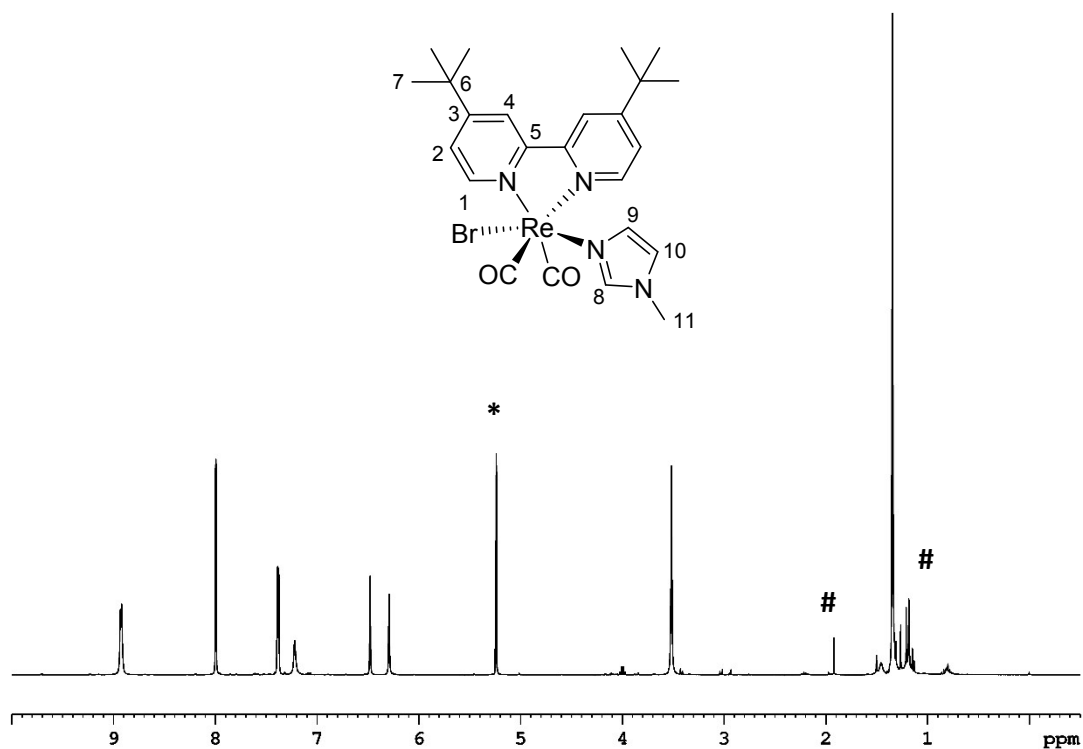

**Figure S2.** 400 MHz  $^1\text{H}$ -NMR of **t-4** (in  $\text{CD}_2\text{Cl}_2$ , \* = solvent residual peak of DCM, # = solvent residual peaks of ethyl acetate). Numbers correspond to the main text.

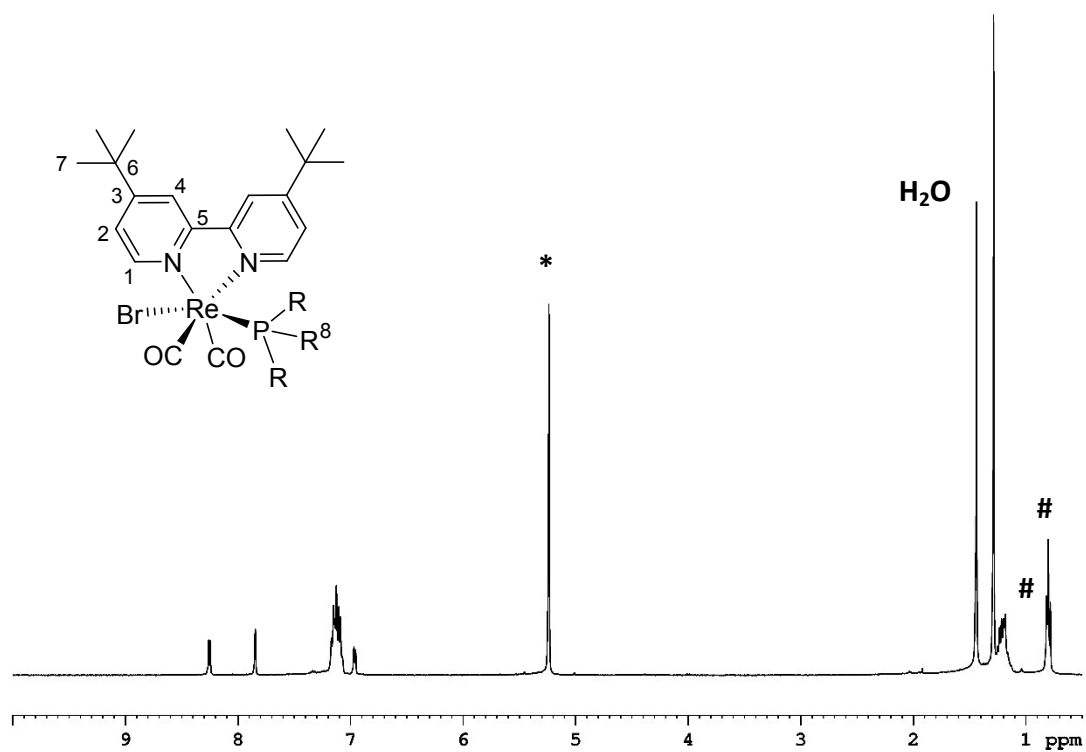

**Figure S3.** 400 MHz <sup>1</sup>H-NMR of **5** (in CD<sub>2</sub>Cl<sub>2</sub>, \* = solvent residual peak of DCM, # = solvent residual peaks of pentane), R = Phen. Numbers correspond to the main text.

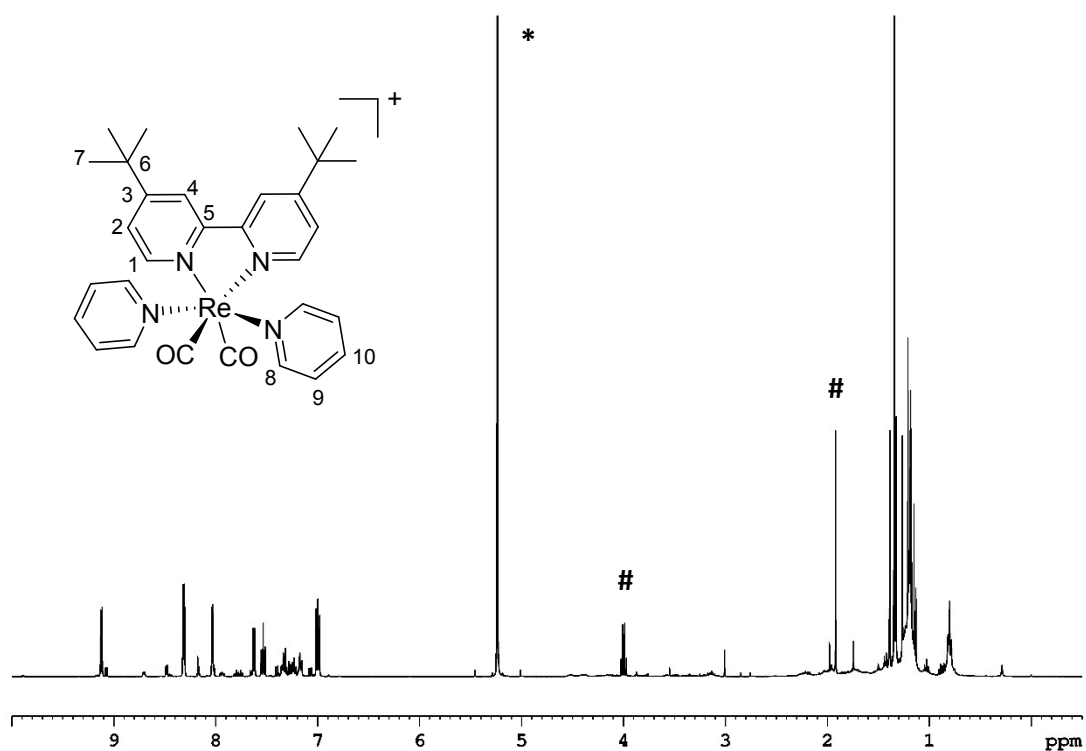

**Figure S4.** 400 MHz  $^1\text{H-NMR}$  of **6** (in  $\text{CD}_2\text{Cl}_2$ , \* = solvent residual peak of DCM, # = solvent residual peaks of ethyl acetate). Numbers correspond to the main text.

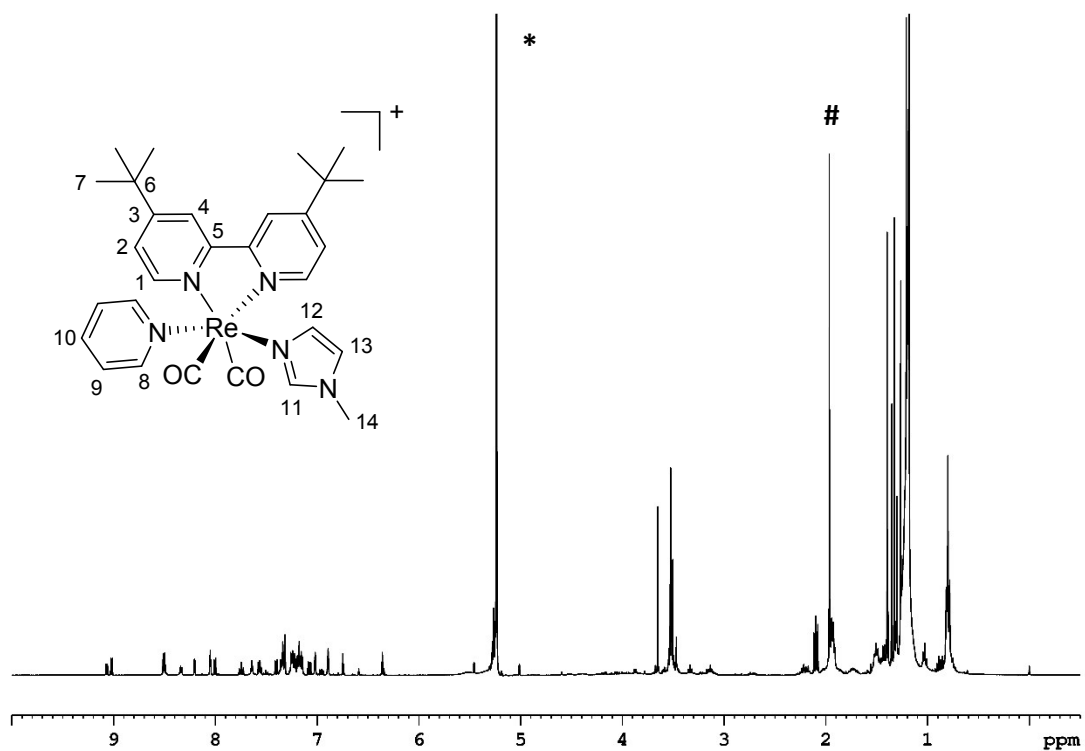

**Figure S5.** 400 MHz  $^1\text{H-NMR}$  of **7** (in  $\text{CD}_2\text{Cl}_2$ , \* = solvent residual peak of DCM, # = solvent residual peak of ethyl acetate). Numbers correspond to the main text.

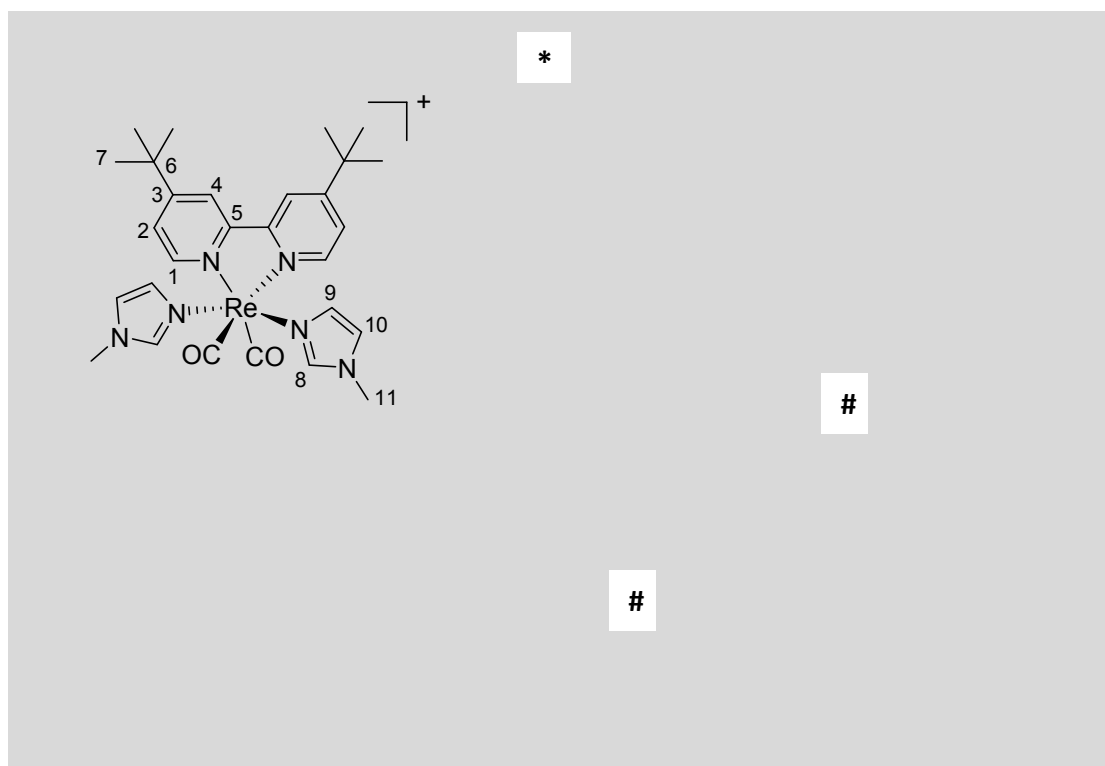

**Figure S6.** 400 MHz  $^1\text{H}$ -NMR of **8** (in  $\text{CD}_2\text{Cl}_2$ , \* = solvent residual peak of DCM, # = solvent residual peaks of ethyl acetate). Numbers correspond to the main text.

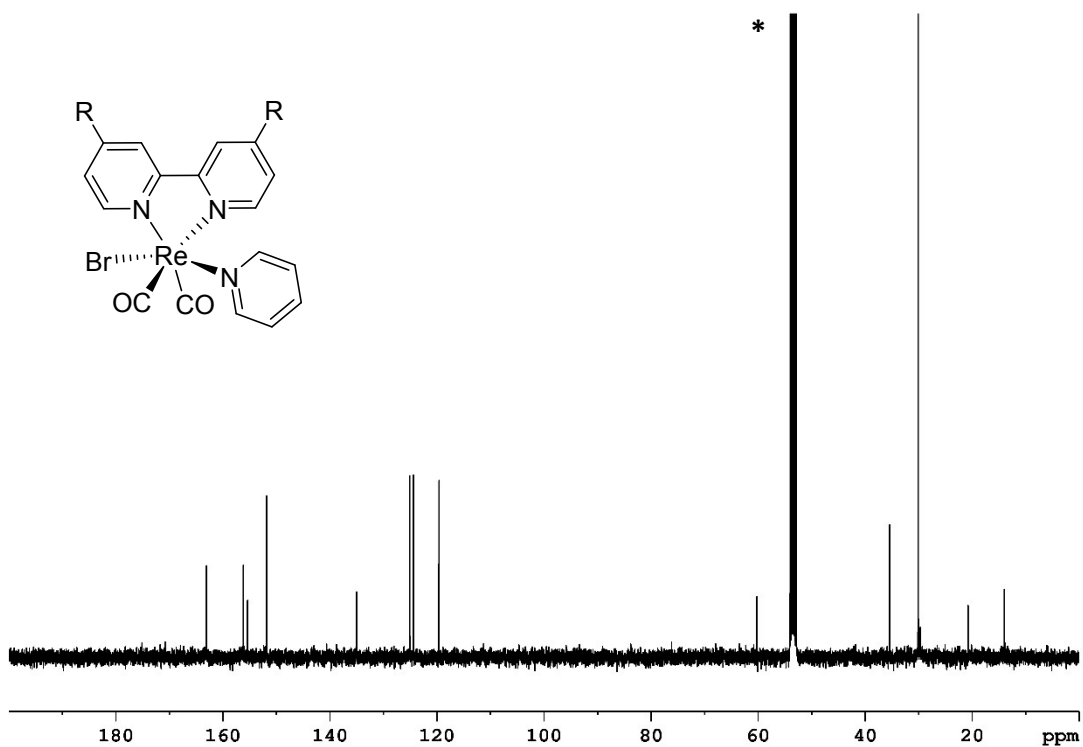

**Figure S7.** 101 MHz  $^{13}\text{C}$ -NMR of **3** (in  $\text{CD}_2\text{Cl}_2$ , \* = solvent residual peak of DCM).

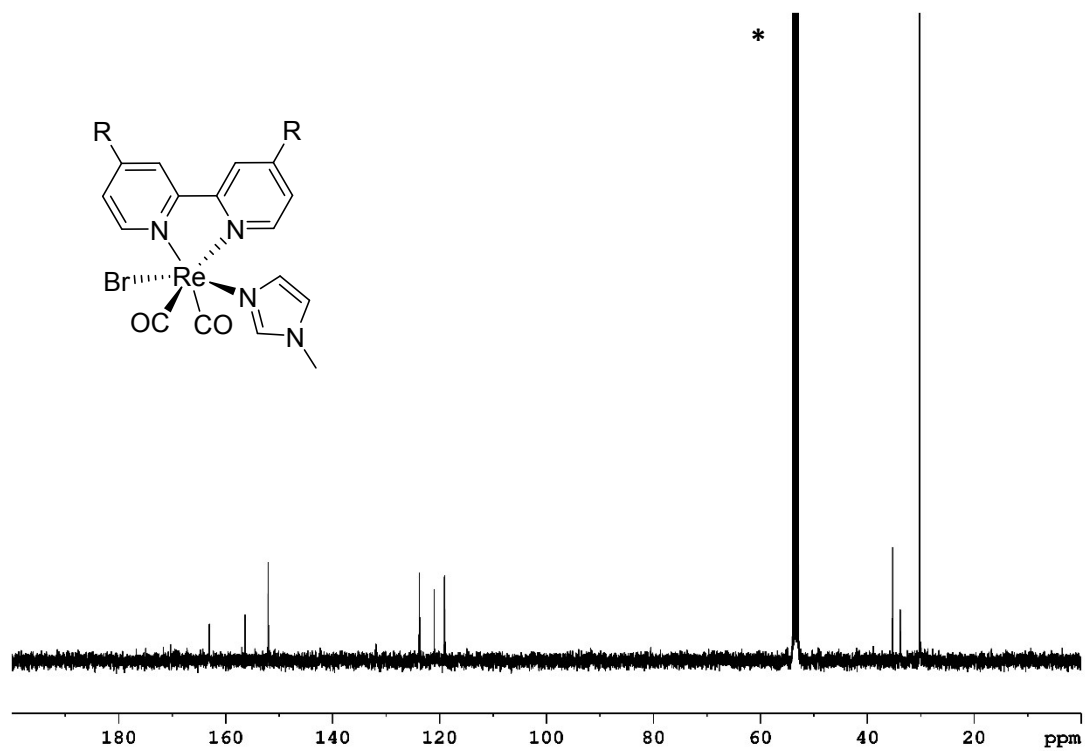

**Figure S8.** 101 MHz <sup>13</sup>C-NMR of **t-4** (in CD<sub>2</sub>Cl<sub>2</sub>, \* = solvent residual peak of DCM).

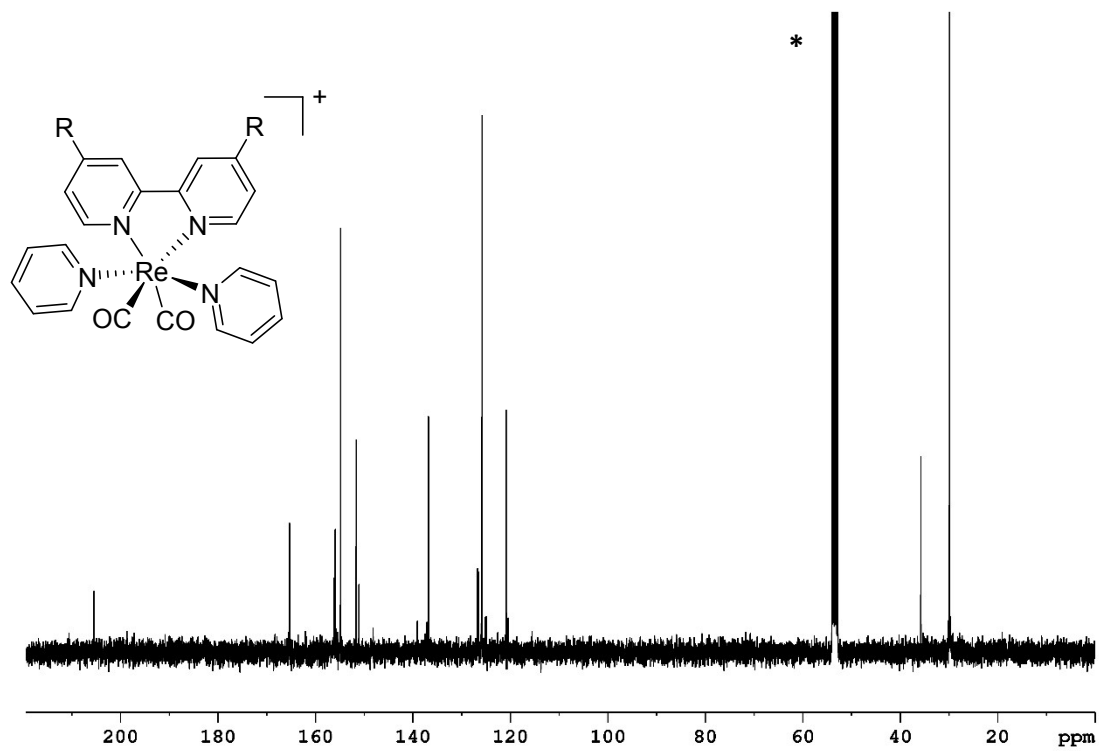

**Figure S9.** 101 MHz <sup>13</sup>C-NMR of **6** (in CD<sub>2</sub>Cl<sub>2</sub>, \* = solvent residual peak of DCM).

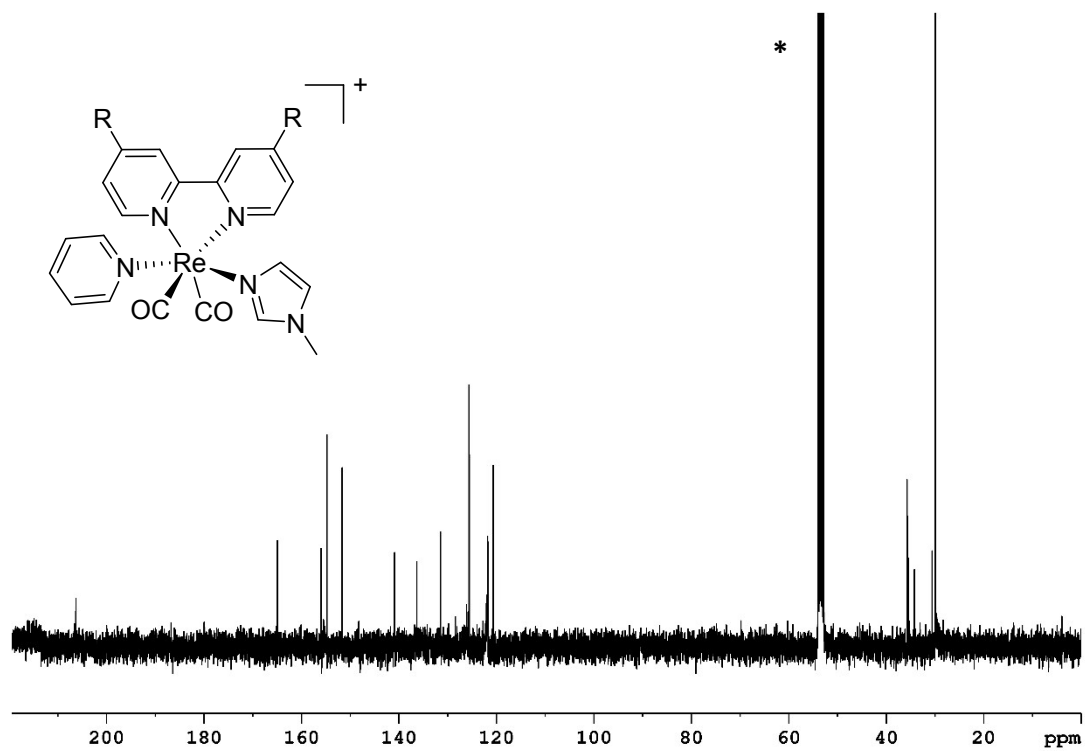

**Figure S10.** 101 MHz  $^{13}\text{C}$ -NMR of **7** (in  $\text{CD}_2\text{Cl}_2$ , \* = solvent residual peak of DCM).

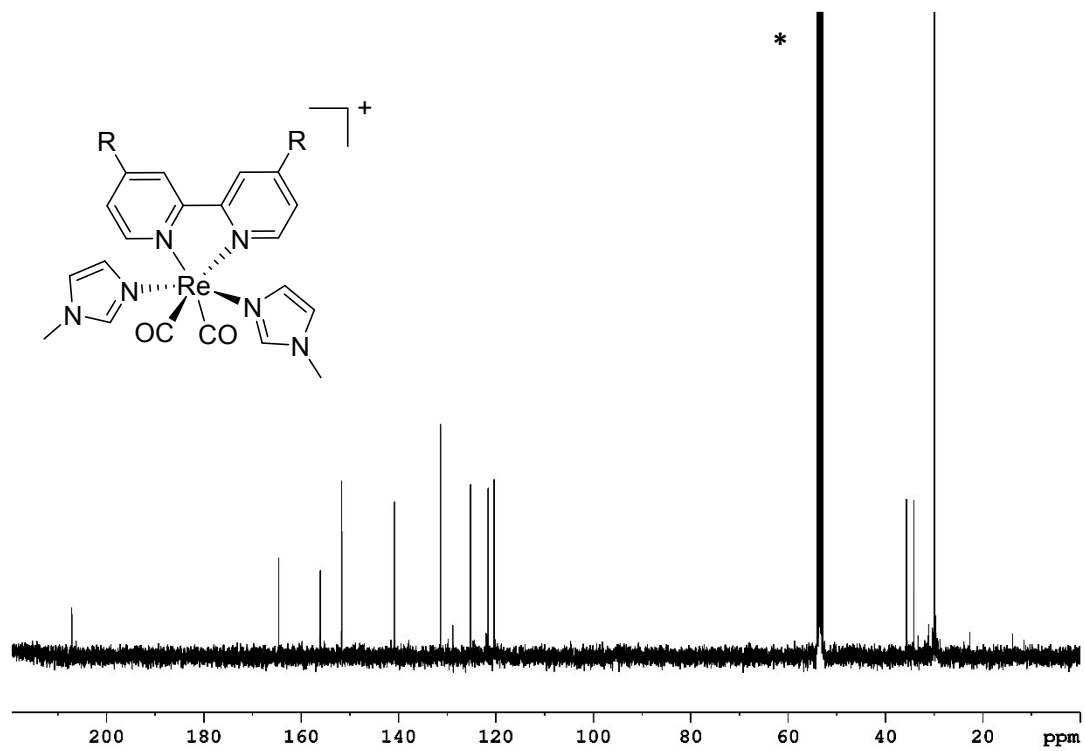

**Figure S11.** 101 MHz  $^{13}\text{C}$ -NMR of **8** (in  $\text{CD}_2\text{Cl}_2$ , \* = solvent residual peak of DCM).





## IR spectra

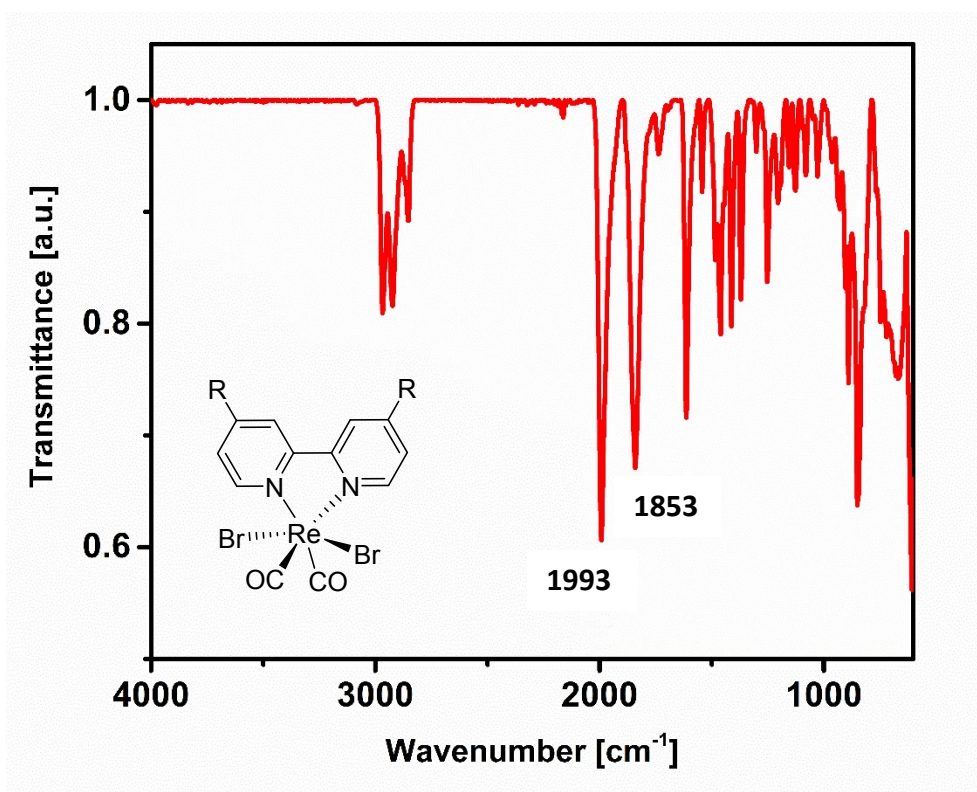

Figure S12. IR spectrum (solid state) of 1.

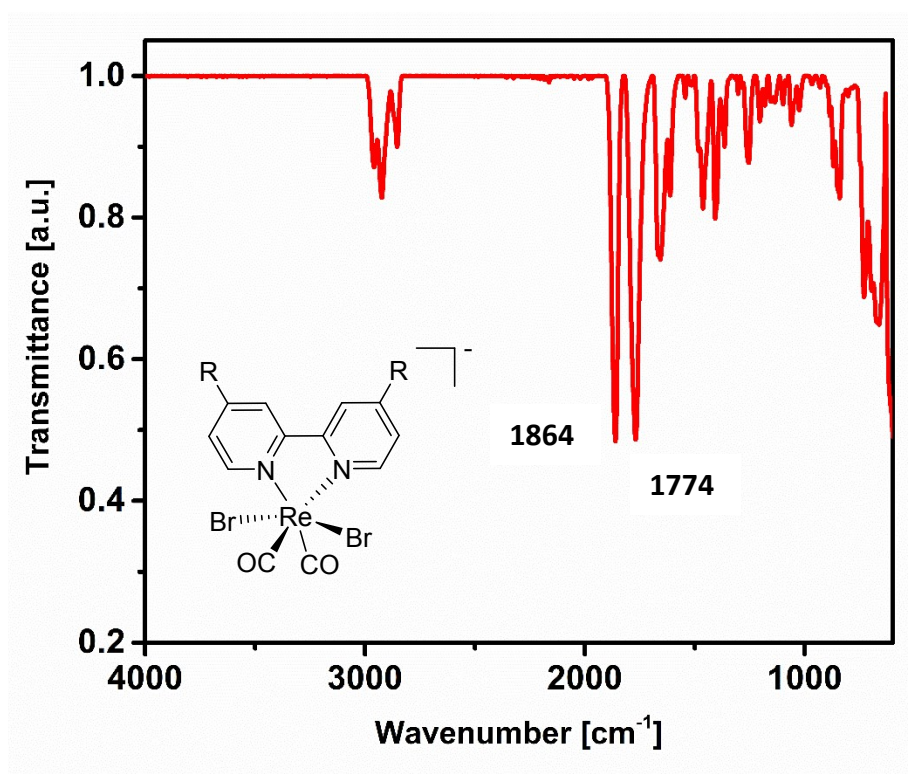

Figure S13. IR spectrum (solid state) of 2.

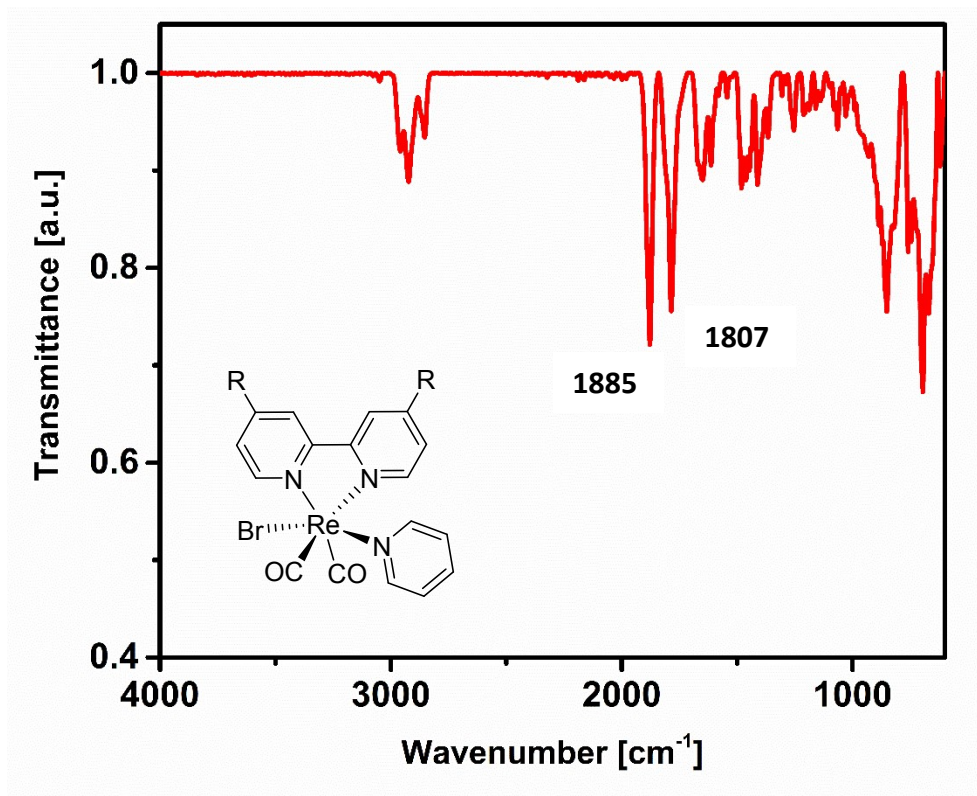

Figure S14. IR spectrum (solid state) of **3**.

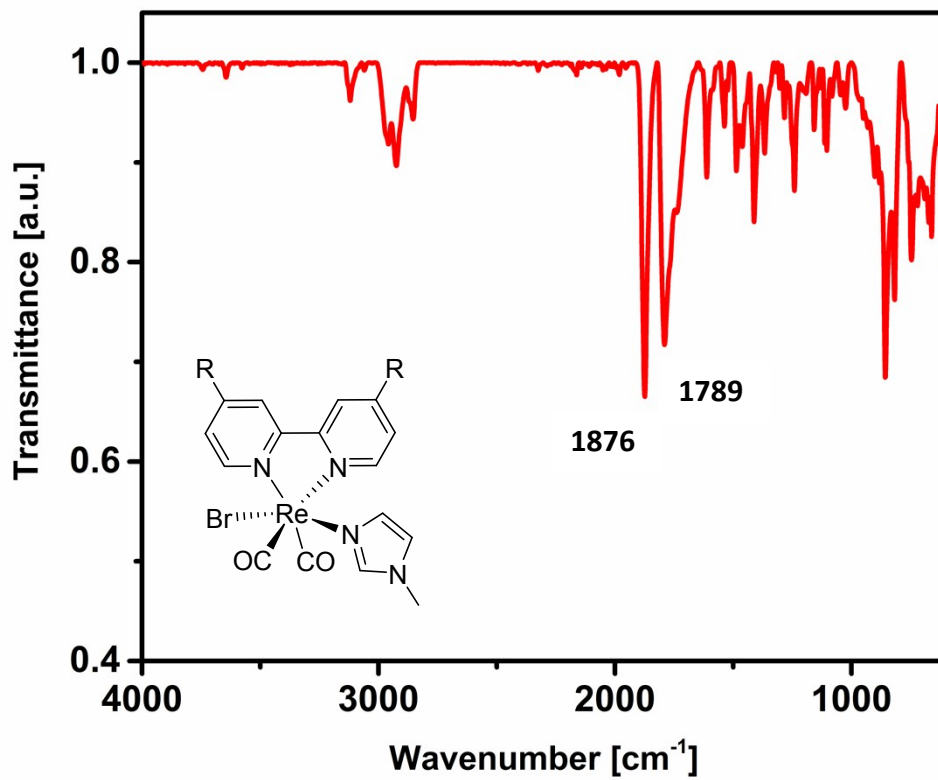

Figure S15. IR spectrum (solid state) of **t-4**.

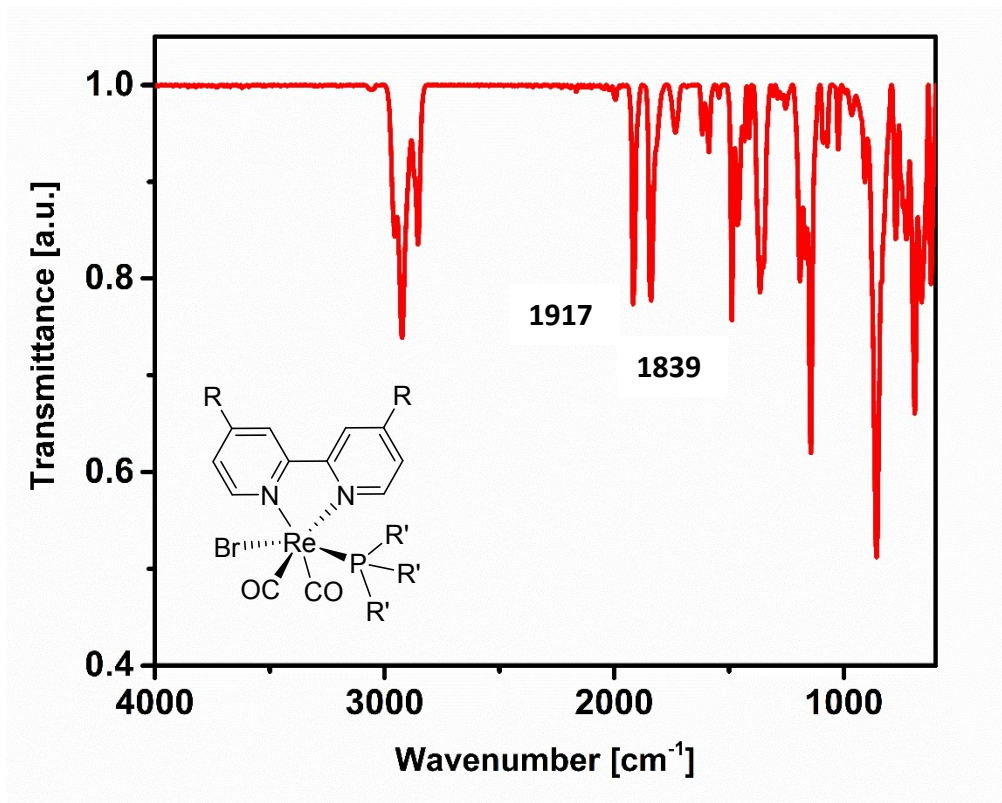

Figure S16. IR spectrum (solid state) of 5.

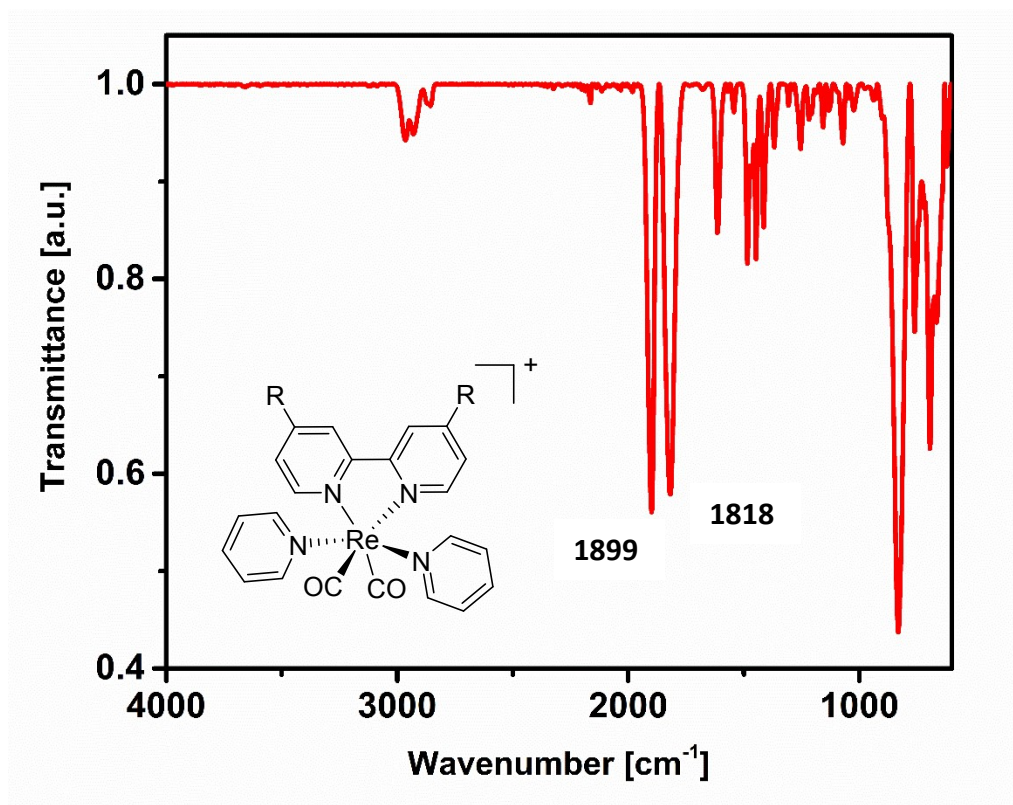

Figure S17. IR spectrum (solid state) of 6.



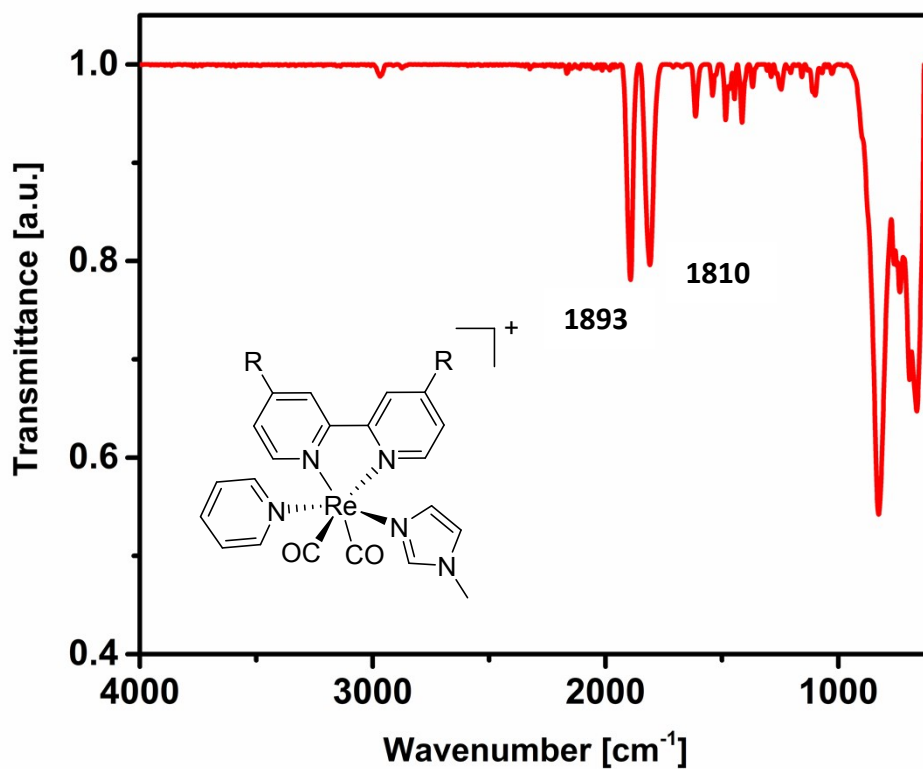

Figure S18. IR spectrum (solid state) of 7.

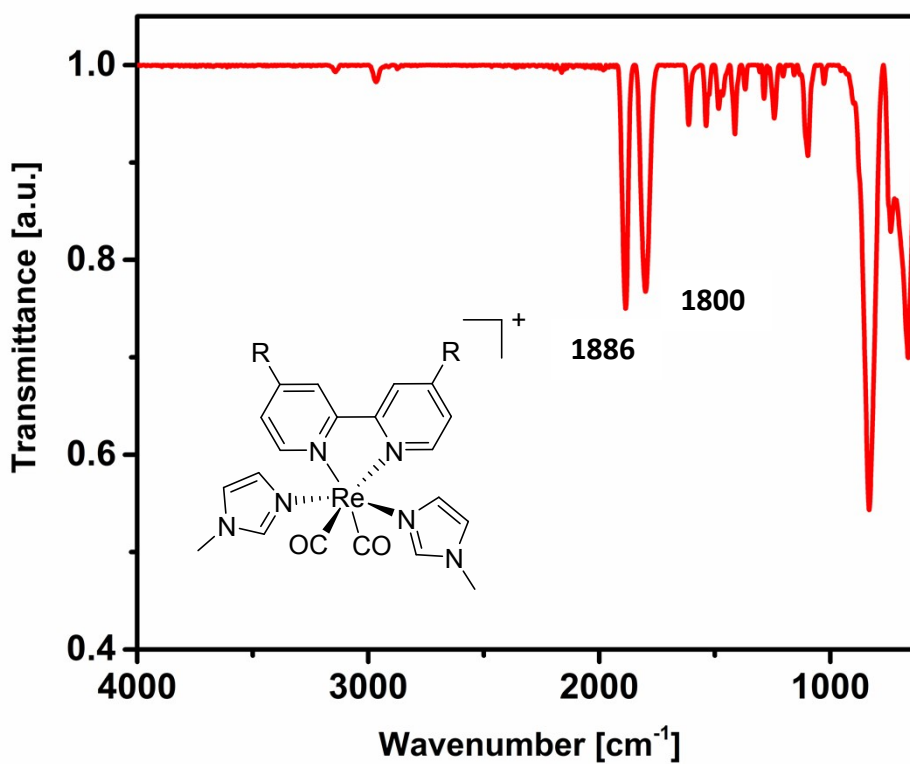

Figure S19. IR spectrum (solid state) of 8.

## UV-Vis spectra

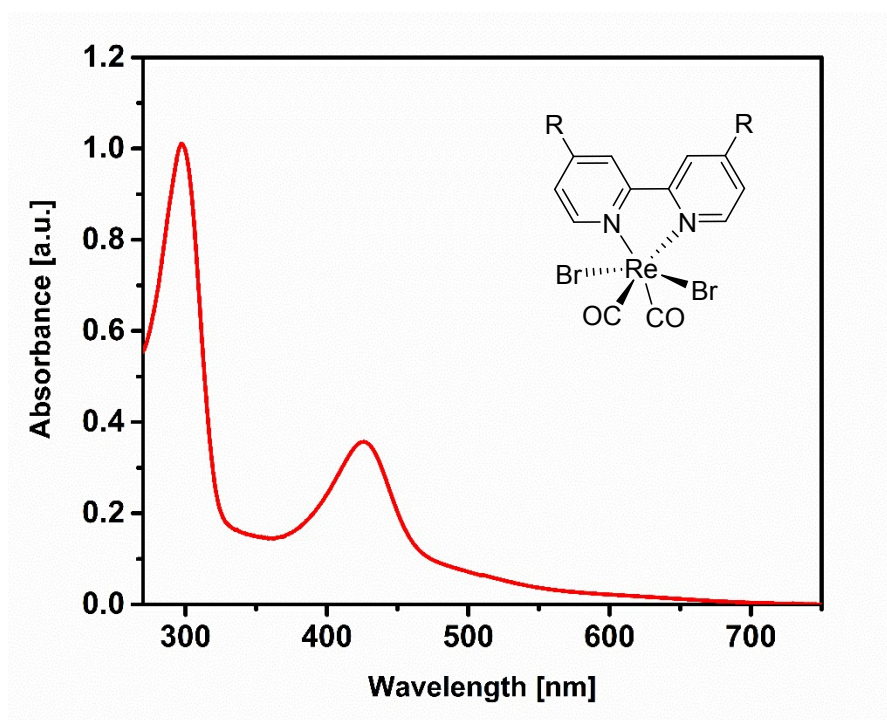

Figure S20. UV-Vis spectrum (in DMF) of 1.

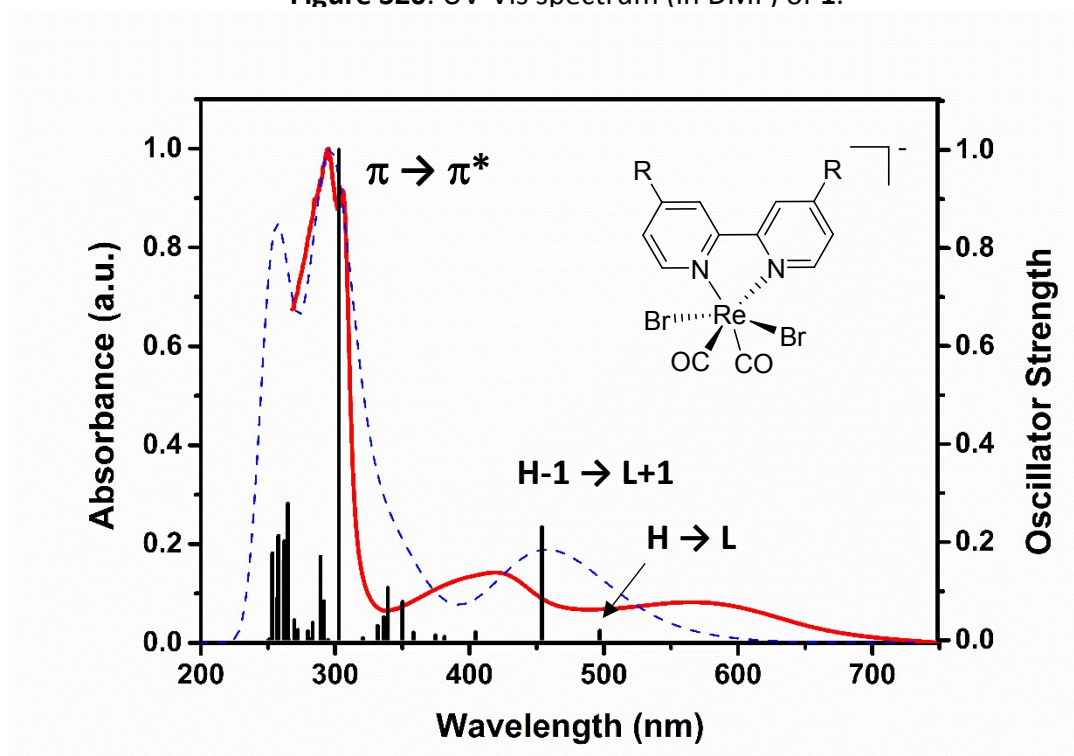

Figure S21. UV-Vis measured spectrum (red), calculated spectrum (blue) and oscillator strength (black) (all in DMF) of 2.

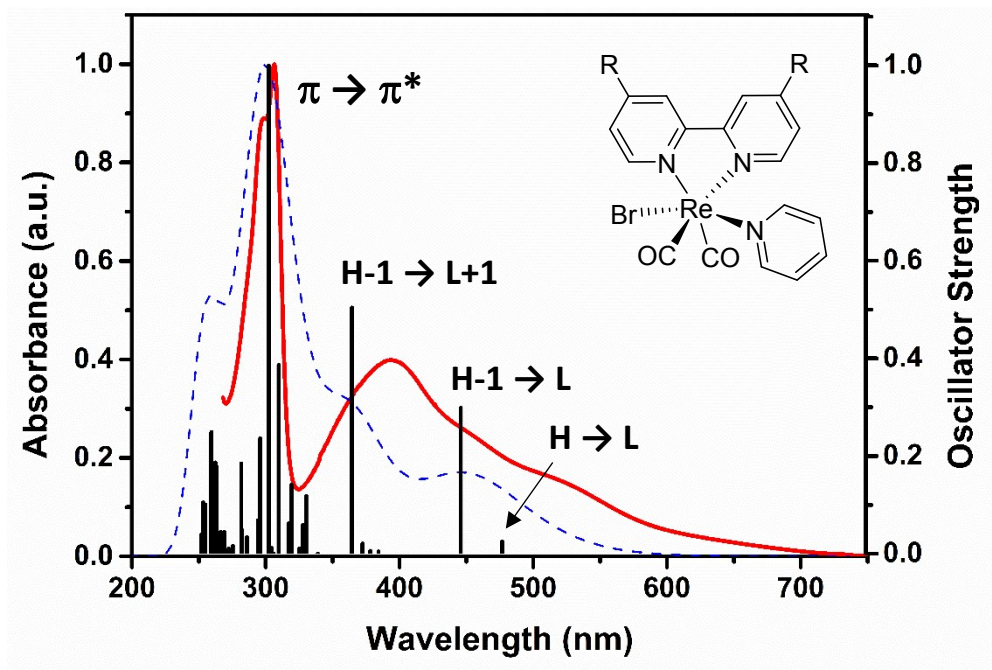

Figure S22. UV-Vis measured spectrum (red), calculated spectrum (blue) and oscillator strength (black) (all in DMF) of **3**.

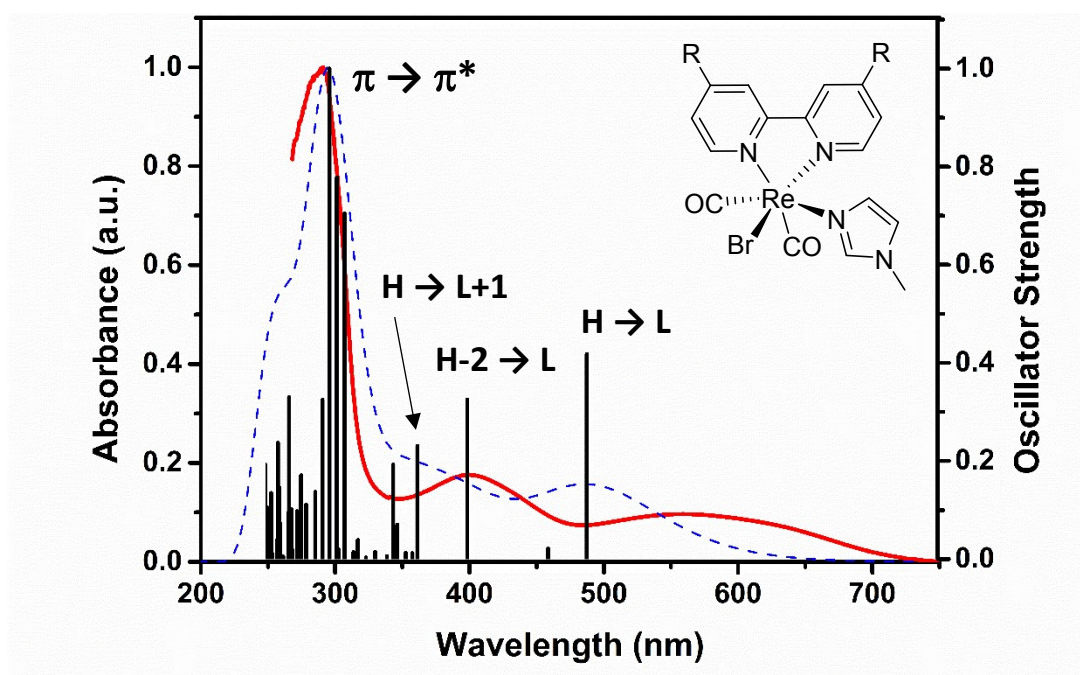

Figure S23. UV-Vis measured spectrum (red), calculated spectrum (blue) and oscillator strength (black) (all in DMF) of **c-4**.



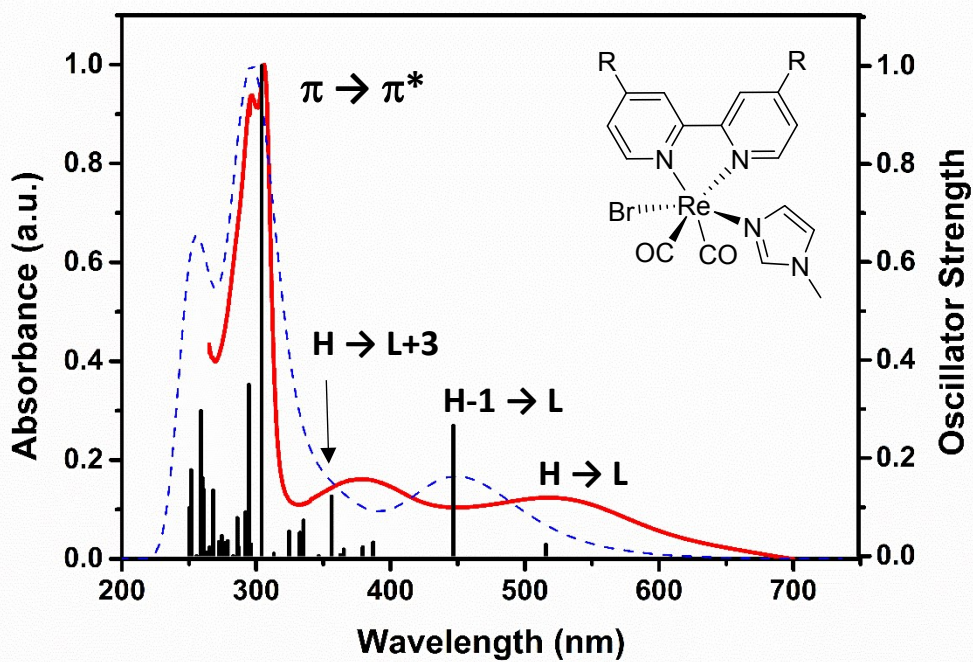

Figure S24. UV-Vis measured spectrum (red), calculated spectrum (blue) and oscillator strength (black) (all in DMF) of **t-4**.

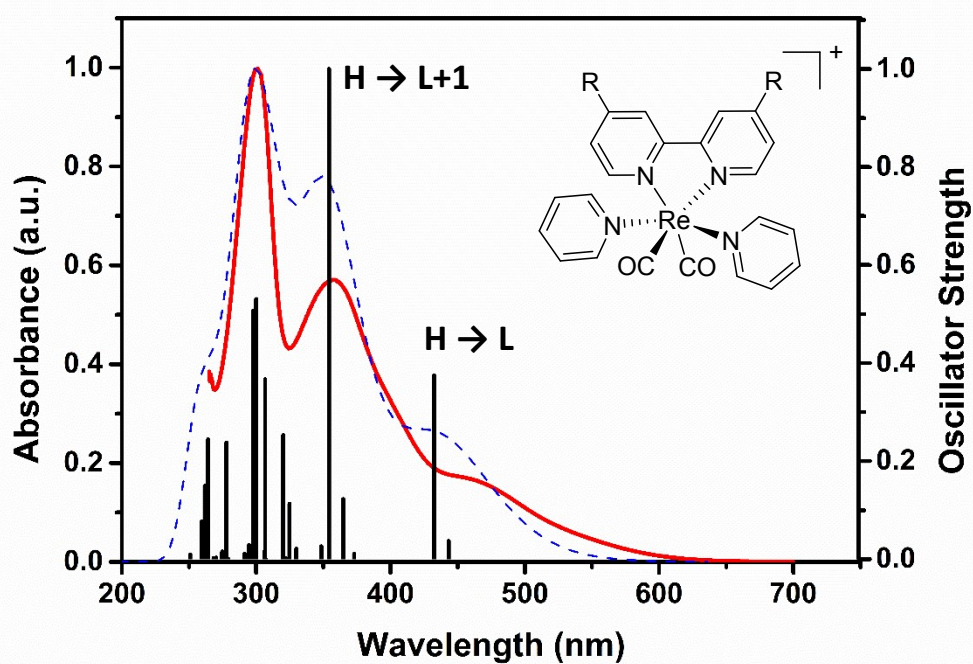

Figure S25. UV-Vis measured spectrum (red), calculated spectrum (blue) and oscillator strength (black) (all in DMF) of **6**.



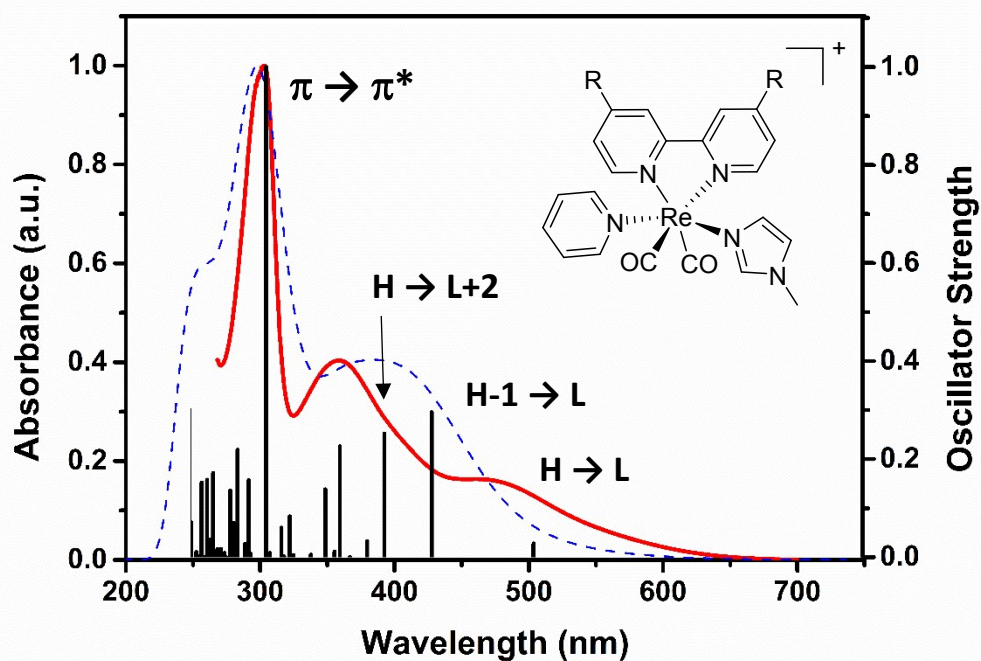

**Figure S26.** UV-Vis measured spectrum (red), calculated spectrum (blue) and oscillator strength (black) (all in DMF) of **7**.

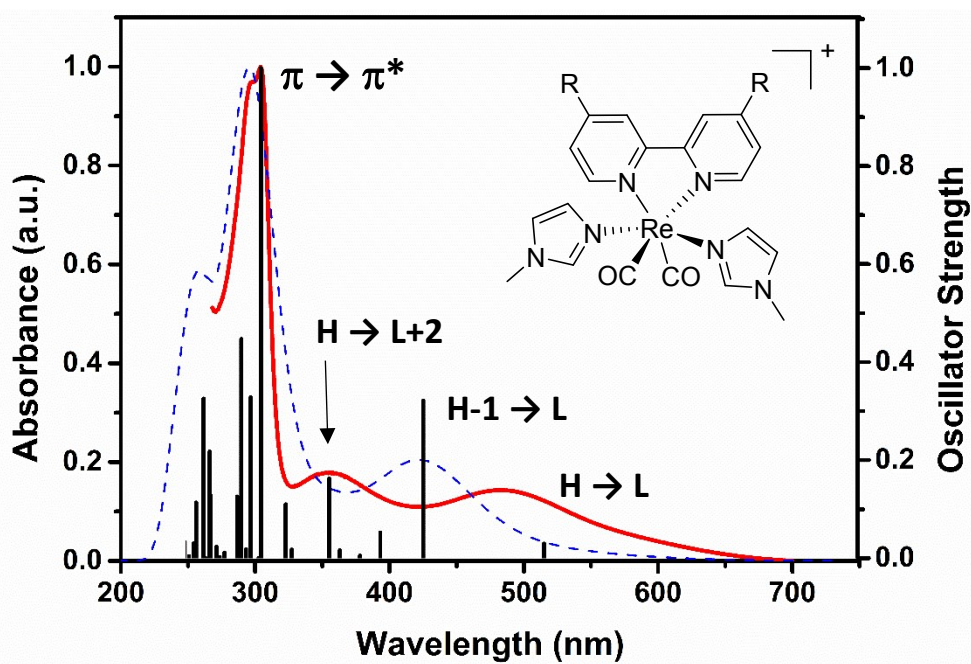

**Figure S27.** UV-Vis measured spectrum (red), calculated spectrum (blue) and oscillator strength (black) (all in DMF) of **8**.

## Crystallography

**Table S1.** Crystallographic details of **1**, **Cl-1**, **3**, **t-4** and **c-4**.

| Compound                                     | <b>1</b>                                                                                                      | <b>Cl-1</b>                                                                        | <b>3</b>                                                           | <b>t-4</b>                                                         | <b>c-4</b>                                                         |
|----------------------------------------------|---------------------------------------------------------------------------------------------------------------|------------------------------------------------------------------------------------|--------------------------------------------------------------------|--------------------------------------------------------------------|--------------------------------------------------------------------|
| formula                                      | C <sub>41</sub> H <sub>50</sub> Br <sub>4</sub> Cl <sub>2</sub> N <sub>4</sub> O <sub>4</sub> Re <sub>2</sub> | C <sub>21</sub> H <sub>25</sub> BrCl <sub>4</sub> N <sub>2</sub> O <sub>2</sub> Re | C <sub>25</sub> H <sub>29</sub> BrN <sub>3</sub> O <sub>2</sub> Re | C <sub>24</sub> H <sub>30</sub> BrN <sub>4</sub> O <sub>2</sub> Re | C <sub>29</sub> H <sub>42</sub> BrN <sub>4</sub> O <sub>2</sub> Re |
| fw                                           | 1425.79                                                                                                       | 745.34                                                                             | 669.62                                                             | 672.63                                                             | 744.77                                                             |
| T, K                                         | 250(2)                                                                                                        | 250(2)                                                                             | 200(2)                                                             | 293(2)                                                             | 200(2)                                                             |
| Crystal system                               | monoclinic                                                                                                    | orthorhombic                                                                       | orthorhombic                                                       | orthorhombic                                                       | orthorhombic                                                       |
| Space group                                  | P2 <sub>1</sub> /c                                                                                            | Pnma                                                                               | Cmce                                                               | Pnma                                                               | Pnma                                                               |
| a, Å                                         | 12.9090(4)                                                                                                    | 12.4068(8)                                                                         | 13.5302(2)                                                         | 14.2929(3)                                                         | 15.1687(3)                                                         |
| b, Å                                         | 31.7496(12)                                                                                                   | 13.9121(6)                                                                         | 34.6388(7)                                                         | 17.3769(3)                                                         | 17.1375(3)                                                         |
| c, Å                                         | 12.5191(4)                                                                                                    | 16.1781(7)                                                                         | 15.2486(2)                                                         | 10.1717(2)                                                         | 12.0964(2)                                                         |
| α, deg                                       | 90                                                                                                            | 90                                                                                 | 90                                                                 | 90                                                                 | 90                                                                 |
| β, deg                                       | 103.998(2)                                                                                                    | 90                                                                                 | 90                                                                 | 90                                                                 | 90                                                                 |
| γ, deg                                       | 90                                                                                                            | 90                                                                                 | 90                                                                 | 90                                                                 | 90                                                                 |
| V, Å <sup>3</sup>                            | 4978.7(3)                                                                                                     | 2792.4(2)                                                                          | 7146.6(2)                                                          | 2526.31(8)                                                         | 3144.50(10)                                                        |
| Z                                            | 4                                                                                                             | 4                                                                                  | 8                                                                  | 4                                                                  | 4                                                                  |
| ρ <sub>calc</sub> , g/cm <sup>3</sup>        | 1.902                                                                                                         | 1.773                                                                              | 1.245                                                              | 1.768                                                              | 1.573                                                              |
| R1 <sup>a</sup> , (wR2) <sup>a</sup>         | 0.0509, 0.0992                                                                                                | 0.0778, 0.2133                                                                     | 0.0439, 0.1308                                                     | 0.0227, 0.0566                                                     | 0.0234, 0.0614                                                     |
| Largest diff. peak/hole (e Å <sup>-3</sup> ) | 0.90/-1.17                                                                                                    | 1.19/-2.21                                                                         | 0.80/-1.60                                                         | 0.85/-0.78                                                         | 0.75/-1.01                                                         |

**Table S2.** Crystallographic details of **5**, **6**, **7** and **8**.

| Compound                                     | <b>5</b>                                                            | <b>6</b>                                                                         | <b>7</b>                                                                         | <b>8</b>                                                                         |
|----------------------------------------------|---------------------------------------------------------------------|----------------------------------------------------------------------------------|----------------------------------------------------------------------------------|----------------------------------------------------------------------------------|
| formula                                      | C <sub>38</sub> H <sub>39</sub> BrN <sub>2</sub> O <sub>2</sub> PRE | C <sub>30</sub> H <sub>34</sub> F <sub>6</sub> N <sub>4</sub> O <sub>2</sub> PRE | C <sub>29</sub> H <sub>35</sub> F <sub>6</sub> N <sub>5</sub> O <sub>2</sub> PRE | C <sub>28</sub> H <sub>36</sub> F <sub>6</sub> N <sub>6</sub> O <sub>2</sub> PRE |
| fw                                           | 852.79                                                              | 813.78                                                                           | 816.79                                                                           | 819.80                                                                           |
| T, K                                         | 200(2)                                                              | 200(2)                                                                           | 250(2)                                                                           | 250(2)                                                                           |
| Crystal system                               | orthorhombic                                                        | monoclinic                                                                       | monoclinic                                                                       | monoclinic                                                                       |
| Space group                                  | Pbca                                                                | I2/a                                                                             | C2/c                                                                             | P2 <sub>1</sub> /c                                                               |
| a, Å                                         | 18.8689(3)                                                          | 32.6007(5)                                                                       | 32.1948(10)                                                                      | 12.3996(3)                                                                       |
| b, Å                                         | 13.4662(2)                                                          | 12.21990(10)                                                                     | 12.3447(3)                                                                       | 13.8863(3)                                                                       |
| c, Å                                         | 28.4268(5)                                                          | 18.8003(3)                                                                       | 28.1669(9)                                                                       | 19.1424(5)                                                                       |
| α, deg                                       | 90                                                                  | 90                                                                               | 90                                                                               | 90                                                                               |
| β, deg                                       | 90                                                                  | 101.7040(10)                                                                     | 144.0940(10)                                                                     | 100.747(2)                                                                       |
| γ, deg                                       | 90                                                                  | 90                                                                               | 90                                                                               | 90                                                                               |
| V, Å <sup>3</sup>                            | 7223.0(2)                                                           | 7333.89(17)                                                                      | 6565.1(3)                                                                        | 3238.21(14)                                                                      |
| Z                                            | 8                                                                   | 8                                                                                | 8                                                                                | 4                                                                                |
| ρ <sub>calc</sub> , g/cm <sup>3</sup>        | 1.568                                                               | 1.474                                                                            | 1.653                                                                            | 1.682                                                                            |
| R1 <sup>a</sup> , (wR2) <sup>a</sup>         | 0.0204, 0.0516                                                      | 0.0422, 0.1171                                                                   | 0.0438, 0.1009                                                                   | 0.0288, 0.0659                                                                   |
| Largest diff. peak/hole (e Å <sup>-3</sup> ) | 0.79/-0.61                                                          | 1.60/-1.51                                                                       | 0.77/-0.78                                                                       | 0.49/-0.60                                                                       |

**Table S3.** Bond lengths and angles of **1**, **Cl-1**, **3**, **t-4** and **c-4**.

| Compound          | <b>1</b>   | <b>Cl-1<sup>a</sup></b> | <b>3<sup>b</sup></b> | <b>t-4<sup>c</sup></b> | <b>c-4<sup>d</sup></b>  |
|-------------------|------------|-------------------------|----------------------|------------------------|-------------------------|
| Re(1)-C(1)        | 1.971(14)  | 2.01(2)                 | 1.889(6)             | 1.892(4)               | 1.883(5)                |
| Re(1)-C(2)        | 1.958(12)  | 2.01(2)                 | 1.889(6)             | 1.892(4)               | 1.874(11)               |
| Re(1)-Br(1)       | 2.4940(14) | 2.491(4)                | 2.5944(9)            | 2.5963(6)              | 2.5782(14)              |
| Re(1)-Br(2)       | 2.5234(12) | 2.403(5)                |                      |                        |                         |
| C(1)-O(1)         | 1.047(13)  | 1.02(2)                 | 1.154(7)             | 1.143(5)               | 1.148(6)                |
| C(2)-O(2)         | 1.114(12)  | 1.02(2)                 | 1.154(7)             | 1.143(5)               | 1.214(11)               |
| Re(1)-N(1)        | 2.166(7)   | 2.184(10)               | 2.178(4)             | 2.177(2)               | 2.136(2)                |
| Re(1)-N(2)        | 2.161(7)   | 2.184(10)               | 2.178(4)             | 2.177(2)               | 2.136(2)                |
| Re(1)-N(3)        |            |                         | 2.140(7)             | 2.147(4)               | 2.222(3)                |
| Re(1)-N(4)        |            |                         |                      |                        |                         |
| angles            | <b>1</b>   | <b>Cl-1<sup>a</sup></b> | <b>3</b>             | <b>t-4</b>             | <b>c-4</b>              |
| C(1)-Re(1)-C(2)   | 85.2(5)    | 85.7(10)                | 88.2(3)              | 87.8(2)                | 87.1(3)                 |
| C(1)-Re(1)-Br(1)  | 91.3(4)    | 88.5(3)                 | 93.68(16)            | 95.69(10)              | 93.72(10)               |
| C(1)-Re(1)-Br(2)  | 91.0(4)    | 86.4(3)                 |                      |                        |                         |
| Br(1)-Re(1)-Br(2) | 171.87(4)  | 173.63(15)              |                      |                        |                         |
| Br(1)-Re(1)-N(3)  |            |                         | 172.38(18)           | 169.38(10)             | 179.65(16) <sup>e</sup> |
| C(1)-Re(1)-N(1)   | 101.3(4)   | 100.0(6)                | 98.96(19)            | 99.02(12)              | 94.19(13)               |
| C(1)-Re(1)-N(2)   | 176.2(4)   | 173.6(5)                | 172.77(19)           | 173.13(12)             | 179.65(16)              |
| N(1)-Re(1)-N(2)   | 75.0(3)    | 74.1(5)                 | 73.8(2)              | 74.15(13)              | 74.97(12)               |
| Br(1)-Re(1)-N(1)  | 86.5(2)    | 88.5(3)                 | 85.39(11)            | 84.44(7)               | 94.85(6)                |
| Br(1)-Re(1)-N(2)  | 87.7(2)    | 88.5(3)                 | 85.39(11)            | 84.45(7)               | 86.04(6)                |

<sup>a</sup>Br(2) refers to Cl(1), N(2) to N(1)#1, C(2) to C(1)#1

<sup>b</sup>N(2) refers to N(1)#1, N(3) to N(2), C(2) to C(1)#1

<sup>c</sup>N(2) refers to N(1)#1, N(3) to N(2), C(2) to C(1)#1

<sup>d</sup>N(2) refers to N(1)#1, N(3) to N(2)

<sup>e</sup>Br(1) refers to C(1)

**Table S4.** Bond lengths and angles of **5**, **6**, **7** and **8**.

| Compound         | <b>5<sup>f</sup></b> | <b>6</b>   | <b>7<sup>g</sup></b> | <b>8<sup>g</sup></b> |
|------------------|----------------------|------------|----------------------|----------------------|
| Re(1)-C(1)       | 1.899(3)             | 1.878(6)   | 1.879(8)             | 1.881(5)             |
| Re(1)-C(2)       | 1.890(3)             | 1.883(5)   | 1.863(9)             | 1.877(5)             |
| Re(1)-Br(1)      | 2.6204(3)            |            |                      |                      |
| C(1)-O(1)        | 1.157(3)             | 1.175(7)   | 1.167(9)             | 1.164(6)             |
| C(2)-O(2)        | 1.160(3)             | 1.168(6)   | 1.194(9)             | 1.156(5)             |
| Re(1)-N(1)       | 2.177(2)             | 2.182(4)   | 2.194(5)             | 2.184(3)             |
| Re(1)-N(2)       | 2.1731(19)           | 2.177(4)   | 2.180(5)             | 2.184(3)             |
| Re(1)-N(3)       | 2.3367(6)            | 2.145(4)   | 2.160(5)             | 2.154(3)             |
| Re(1)-N(4)       |                      | 2.150(4)   | 2.163(6)             | 2.156(3)             |
| angles           | <b>5</b>             | <b>6</b>   | <b>7</b>             | <b>8</b>             |
| C(1)-Re(1)-C(2)  | 89.29(11)            | 88.8(2)    | 88.1(3)              | 87.5(2)              |
| C(1)-Re(1)-Br(1) | 96.45(8)             |            |                      |                      |
| C(1)-Re(1)-N(1)  | 170.34(9)            | 98.07(19)  | 98.3(3)              | 97.66(16)            |
| C(1)-Re(1)-N(2)  | 95.99(9)             | 171.35(19) | 172.9(3)             | 171.87(16)           |
| N(1)-Re(1)-N(2)  | 74.41(7)             | 73.99(14)  | 73.9(2)              | 74.24(12)            |
| Br(1)-Re(1)-P(1) | 173.845(16)          |            |                      |                      |
| N(3)-Re(1)-N(4)  |                      | 173.15(16) | 171.8(2)             | 171.98(13)           |
| Br(1)-Re(1)-N(1) | 81.57(5)             |            |                      |                      |
| Br(1)-Re(1)-N(2) | 82.67(5)             |            |                      |                      |

<sup>f</sup>N(3) refers to P(1)<sup>g</sup>N(4) refers to N(5)

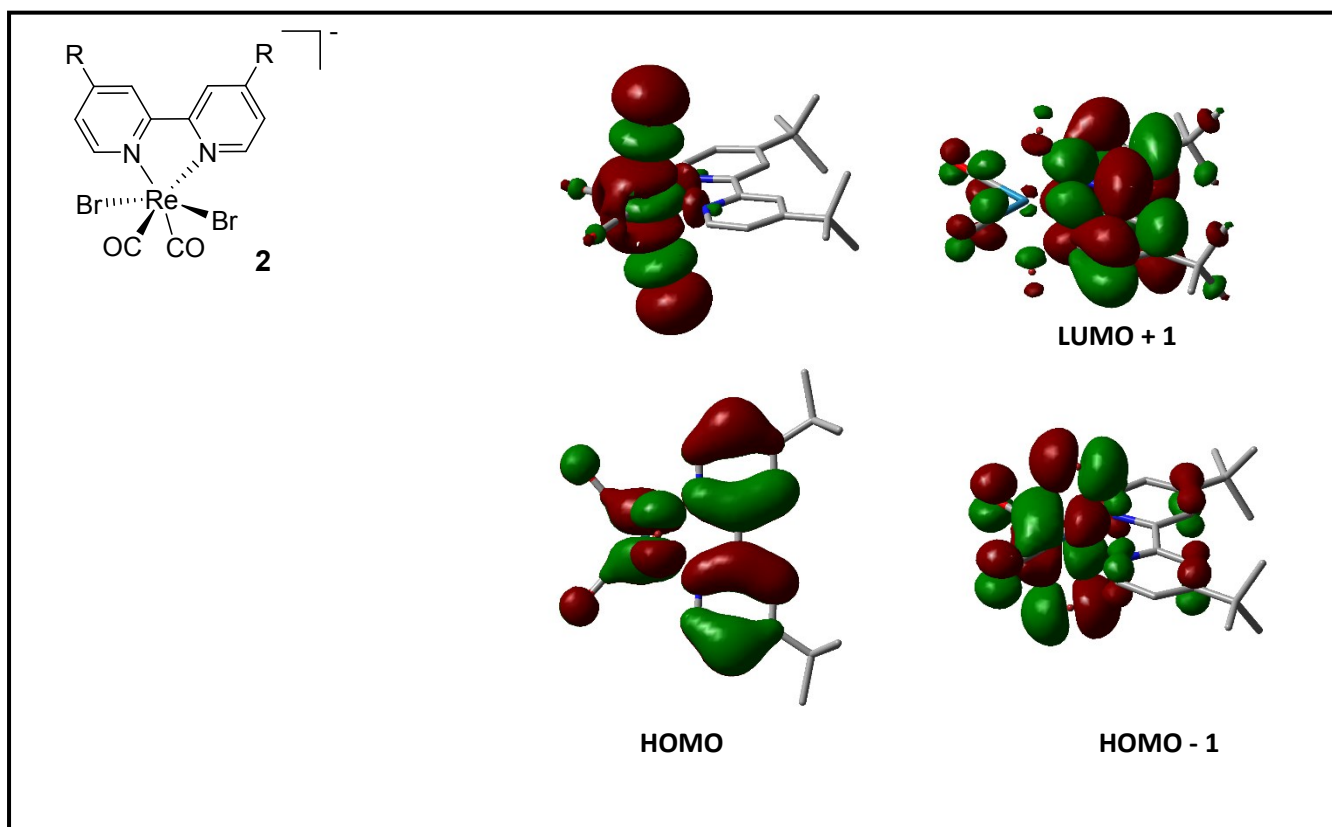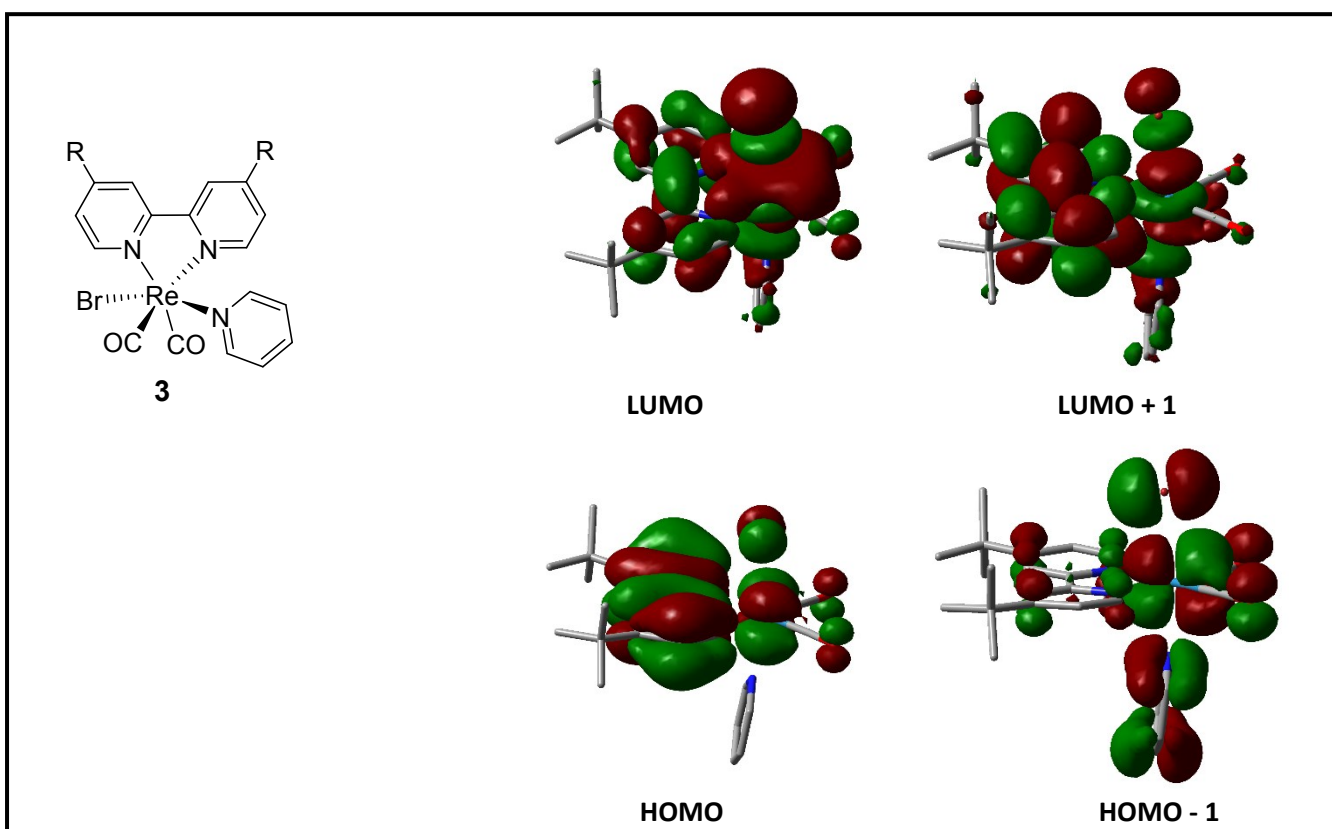

**Figure S28.** Calculated molecular orbitals of complexes **2** and **3**.

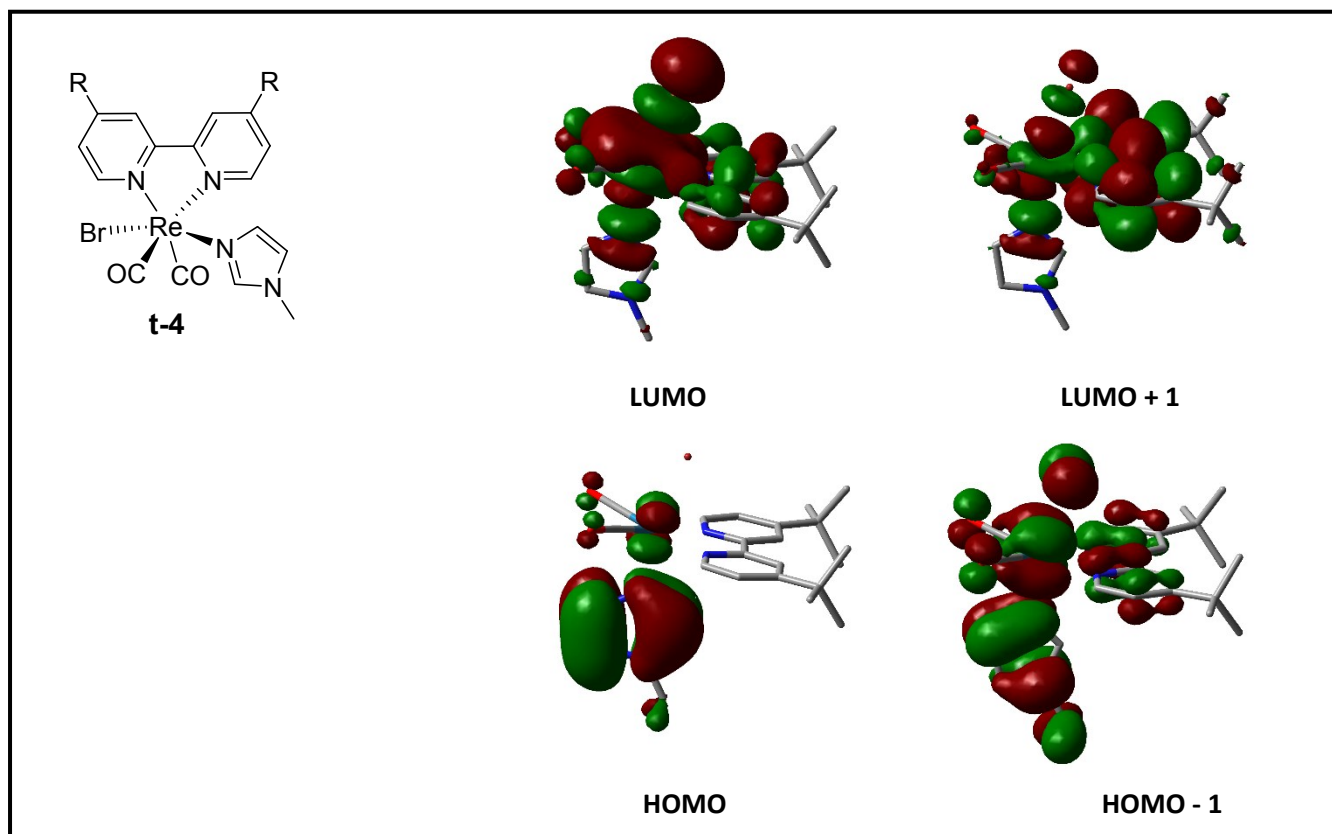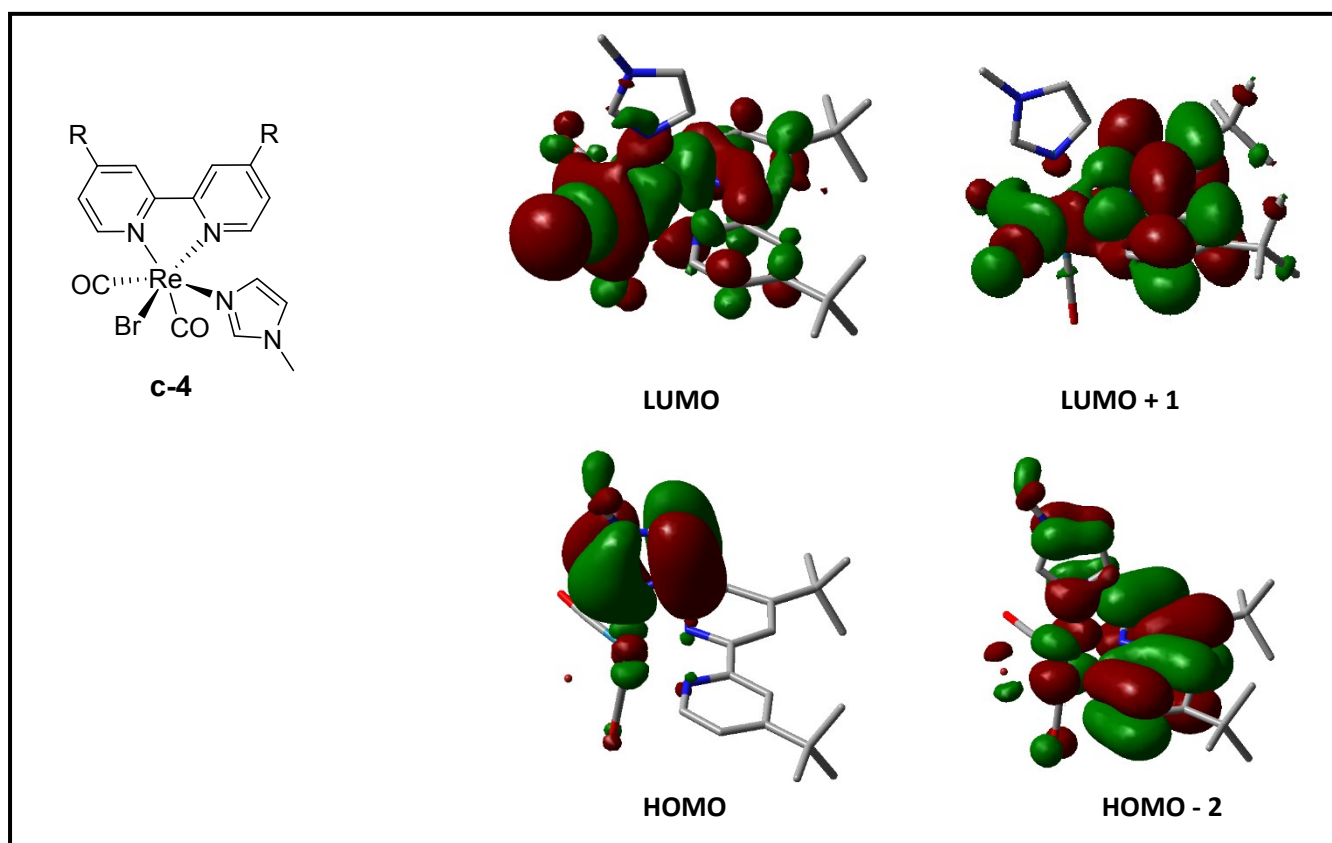

**Figure S29.** Calculated molecular orbitals of complexes **t-4** and **c-4**.

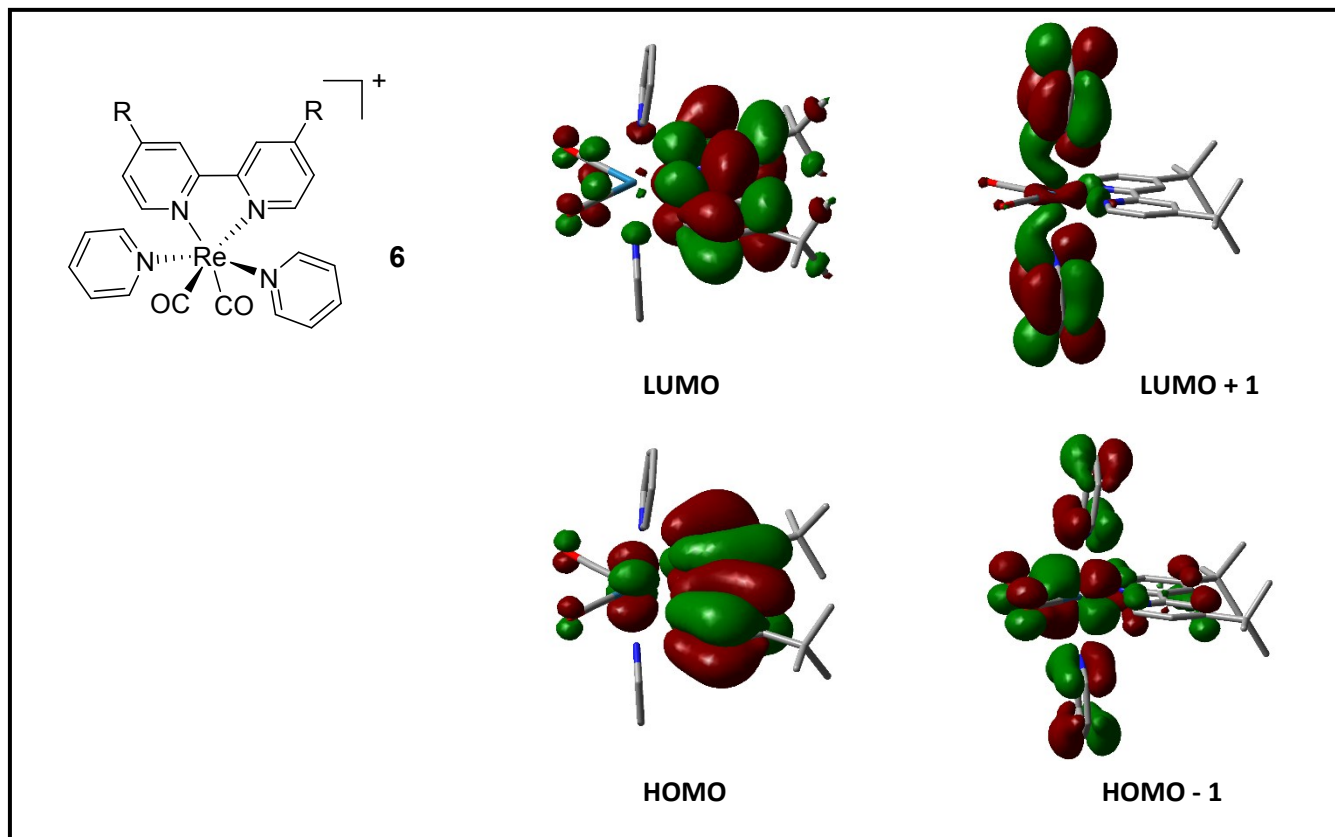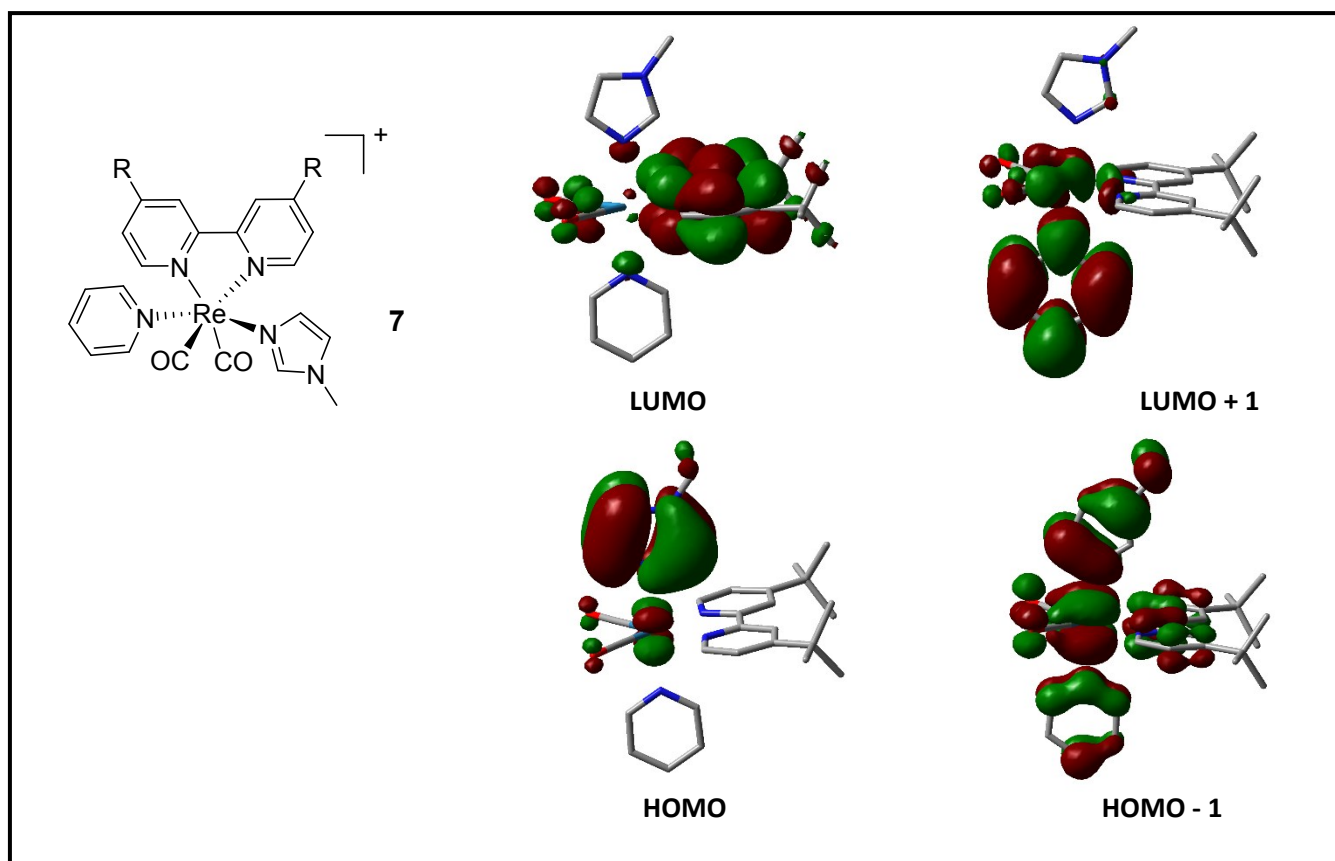

**Figure S30.** Calculated molecular orbitals of complexes **6** and **7**.



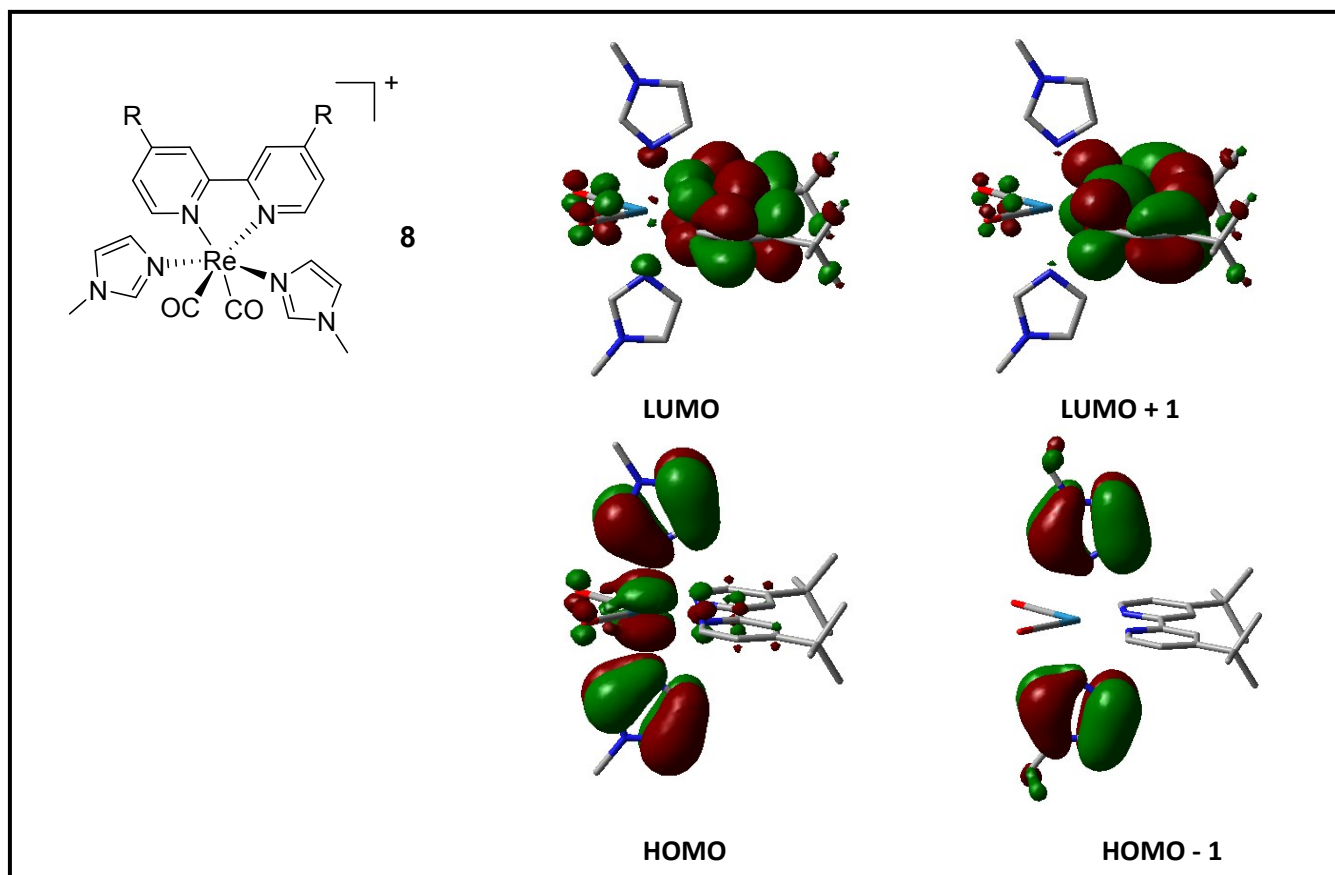

**Figure S31.** Calculated molecular orbitals of complex 8.

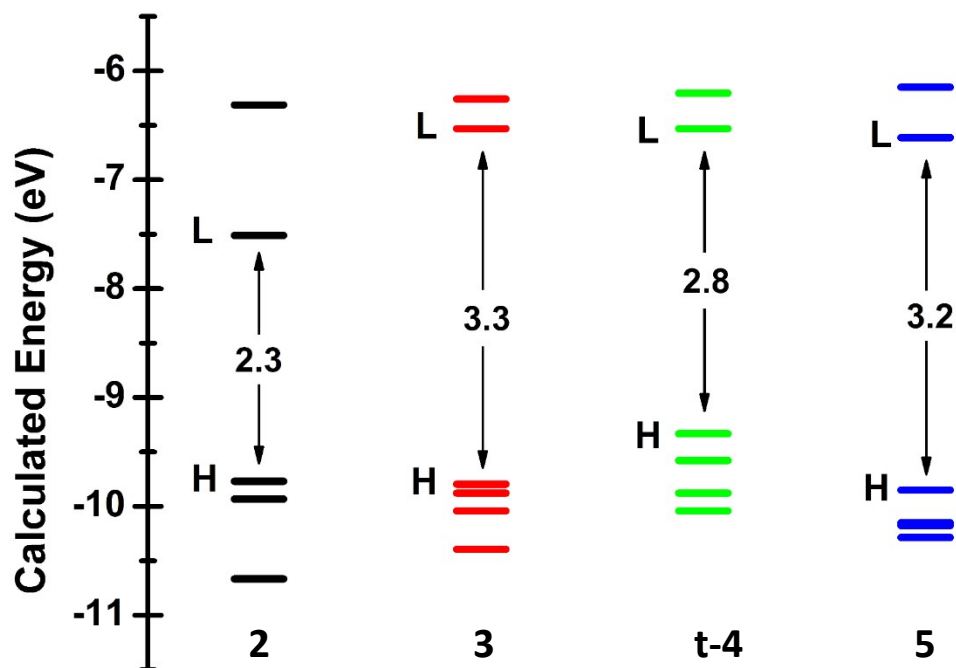

Figure S32. DFT energy diagram of  $[\text{Re}(\text{CO})_2(\text{tBu}_2\text{bpy})\text{Br}(\text{L})]$  complexes, highlighting the HOMO – LUMO energy gap.

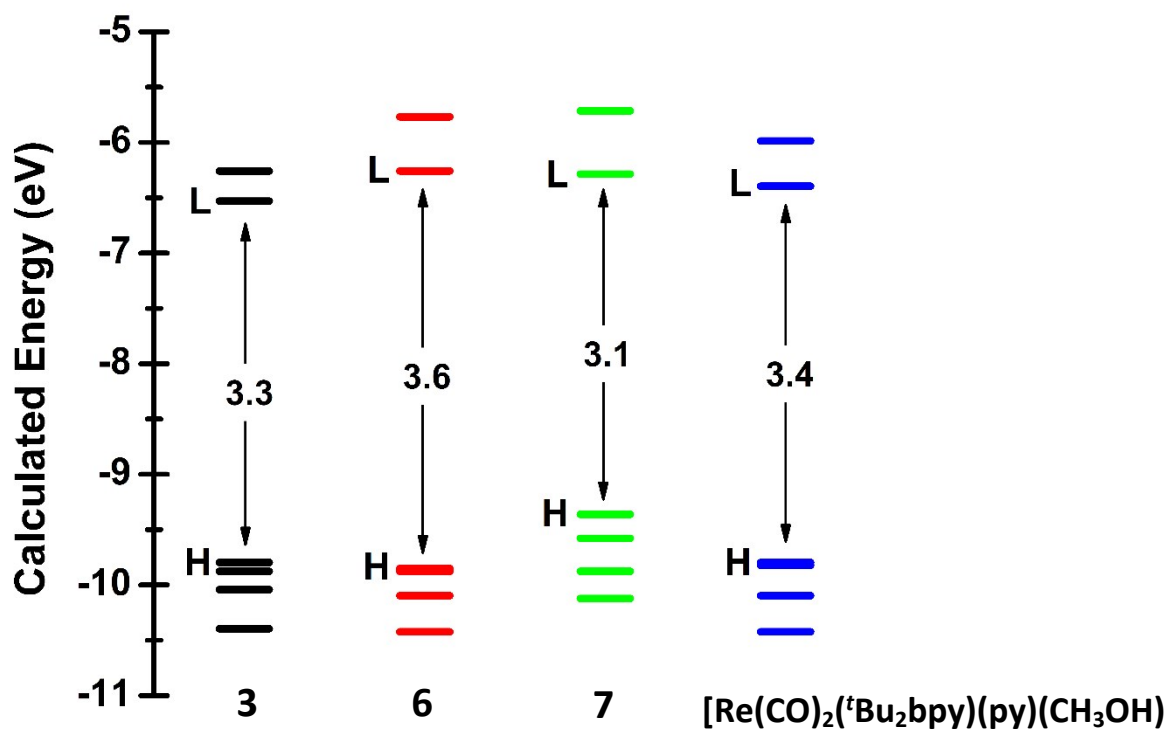

Figure S36. DFT energy diagram of  $[\text{Re}(\text{CO})_2(\text{tBu}_2\text{bpy})(\text{py})(\text{L})]^n$  complexes, highlighting the HOMO – LUMO energy gap.
